1 **The Lands cycle modulates plasma membrane lipid organization and insulin sensitivity**  
2 **in skeletal muscle**

3

4 Patrick J. Ferrara,<sup>1,2,5,9</sup> Xin Rong,<sup>3</sup> J. Alan Maschek,<sup>1,4</sup> Anthony R.P. Verkerke,<sup>1,2,5,9</sup> Piyarat  
5 Siripoksup,<sup>1,6</sup> Haowei Song,<sup>7</sup> Karthickeyan C. Krishnan,<sup>8</sup> Jordan M. Johnson,<sup>1,2,5,9</sup> John Turk,<sup>7</sup>  
6 Joseph A. Houmar,<sup>5,9</sup> Aldons J. Lusic,<sup>8</sup> James E. Cox,<sup>1,4,10</sup> Saame Raza Shaikh,<sup>5,11</sup> Peter  
7 Tontonoz,<sup>3</sup> \*Katsuhiko Funai<sup>1,2,5,6,9,12,\*</sup>

8

9 <sup>1</sup>Diabetes and Metabolism Research Center, University of Utah, Salt Lake City, UT, USA

10 <sup>2</sup>Department of Nutrition and Integrative Physiology, University of Utah, Salt Lake City, UT, USA

11 <sup>3</sup>Department of Pathology and Laboratory Medicine, University of California, Los Angeles, Los  
12 Angeles, CA, USA

13 <sup>4</sup>Metabolomics, Mass Spectrometry, and Proteomics Core, University of Utah, Salt Lake City,  
14 UT, USA

15 <sup>5</sup>East Carolina Diabetes and Obesity Institute, East Carolina University, Greenville, NC, USA

16 <sup>6</sup>Department of Physical Therapy and Athletic Training, University of Utah, Salt Lake City, UT,  
17 USA

18 <sup>7</sup>Division of Endocrinology Metabolism and Lipid Research, School of Medicine, Washington  
19 University in St. Louis, St. Louis, MO, USA

20 <sup>8</sup>Department of Medicine, Cardiology Division at the University of California Los Angeles, Los  
21 Angeles, CA, USA

22 <sup>9</sup>Human Performance Laboratory, East Carolina University, Greenville, NC, USA

23 <sup>10</sup>Department of Biochemistry, University of Utah, Salt Lake City, UT, USA

24 <sup>11</sup>Department of Nutrition, University of North Carolina-Chapel Hill, Chapel Hill, NC, USA

25 <sup>12</sup>Molecular Medicine Program, University of Utah, Salt Lake City, UT, USA

26

27 \*Correspondence:

28 Katsuhiko Funai, PhD

29 Diabetes & Metabolism Research Center

30 15 N, 2030 E, Salt Lake City, UT 84112

31 Phone: (801) 585-1781

32 Fax: (801) 585-0701

33 Email: [kfunai@utah.edu](mailto:kfunai@utah.edu)

34

35 **Conflict of Interest**

36 The authors have declared that no conflict of interest exists.

37

38

39 **Abstract**

40 Aberrant lipid metabolism promotes the development of skeletal muscle insulin resistance, but  
41 the exact identity of lipid-mediated mechanisms relevant to human obesity remains unclear. A  
42 comprehensive lipidomic analyses of primary myocytes from lean insulin-sensitive (LN) and  
43 obese insulin-resistant (OB) individuals revealed several species of lysophospholipids (lyso-PL)  
44 that were differentially-abundant. These changes coincided with greater expression of  
45 lysophosphatidylcholine acyltransferase 3 (LPCAT3), an enzyme involved in phospholipid  
46 transacylation (Lands cycle). Strikingly, mice with skeletal muscle-specific knockout of LPCAT3  
47 (LPCAT3-MKO) exhibited greater muscle lyso-PC/PC, concomitant with greater insulin  
48 sensitivity *in vivo* and insulin-stimulated skeletal muscle glucose uptake *ex vivo*. Absence of  
49 LPCAT3 reduced phospholipid packing of the cellular membranes and increased plasma  
50 membrane lipid clustering, suggesting that LPCAT3 affects insulin receptor phosphorylation by  
51 modulating plasma membrane lipid organization. In conclusion, obesity accelerates the skeletal  
52 muscle Lands cycle, whose consequence might induce the disruption of plasma membrane  
53 organization that suppresses muscle insulin action.

54 **Introduction**

55 Type 2 diabetes is the 7<sup>th</sup> leading cause of death in the United States (1) and is a major risk  
56 factor for cardiovascular disease, the leading cause of death (2). Skeletal muscle is the site of  
57 the largest glucose disposal in humans (3, 4). Insulin resistance in skeletal muscle is a  
58 necessary precursor to type 2 diabetes (5) and can be triggered by aberrant lipid metabolism (6-  
59 8). Several classes of lipids have been implicated in initiating cellular signals that suppress  
60 insulin action, but there has not been a clear consensus that these molecules are upregulated in  
61 skeletal muscle insulin resistance that occurs in the human population (9-14).

62

63 A difficulty in accurately measuring the muscle lipidome is confounded by the intramyofibrillar  
64 adipocytes which are particularly abundant in muscle biopsy samples from obese humans.  
65 Human skeletal muscle cells (HSkMC) are primary myoblasts that can be isolated, propagated,  
66 and differentiated from muscle biopsies. This *in vitro* system provides a unique model to study  
67 the skeletal muscle lipidome and signaling pathways free of contaminating cell types and  
68 circulating factors that affect muscle metabolism. Importantly, these HSkMC are known to retain  
69 their insulin sensitivity phenotype *ex vivo*, providing a platform to study mechanisms directly  
70 relevant to human physiology (15, 16).

71

72 In this study, we harvested HSkMC from lean insulin-sensitive (LN) and obese insulin-resistant  
73 (OB) subjects (Subject Characteristics: Table S1). We then propagated and differentiated these  
74 samples for analyses of the muscle lipidome, gene expression profile, insulin signaling, and  
75 membrane properties (Figure 1A). This approach led us to examine the lysophospholipid (lyso-  
76 PL) remodeling pathway (Lands cycle) as a potential diet-responsive mechanism that regulates  
77 skeletal muscle insulin action. Below we provide evidence that implicates this pathway in the  
78 pathogenesis of diet-induced skeletal muscle insulin resistance. Genetic or pharmacologic

79 suppression of this pathway was sufficient to enhance skeletal muscle insulin action *in vitro* and  
80 *in vivo*.

81

## 82 **Results**

83 A global lipidomic analysis of LN and OB myotubes revealed many classes of lipids that were  
84 differentially abundant (Figure 1B, Figure S1A-L). Among these, several species of

85 lysophospholipids (lyso-PL), intermediates of the Lands cycle (17), were lower in OB HSkMC  
86 compared to LN (Figure 1C), a finding not previously described for an insulin-resistant state.

87 While species of many classes of lyso-PL were reduced with obesity, the ratio of lyso-PL to its  
88 parent phospholipid were significantly lower for only lysophosphatidylcholine (lyso-

89 PC)/phosphatidylcholine (PC) (Figure 1D). Previous studies suggest that altering the lyso-PC  
90 content of cell membranes is sufficient to alter the physical properties of membranes (18, 19).

91 Consistent with this notion, phospholipid packing of LN and OB myotubes were remarkably  
92 different, with OB cells exhibiting more tightly packed membrane head groups compared to LN  
93 (Figure 1E&F). This occurred in the absence of changes in the phospholipid acyl-chain  
94 saturation index (Figure S1M).

95

96 What is the molecular mechanism by which obesity promotes a lower abundance of lyso-PL in  
97 skeletal muscle? LN and OB HSkMC utilized for the lipidomic analyses were cultured *ex vivo* for  
98 several weeks in identical media conditions. Thus, differences in the lipidome of these samples  
99 are likely the result of genetic and/or epigenetic influences, instead of hormonal or neuronal

100 inputs that alter cells *in vivo*. We reasoned that such differential programming might be

101 expected to manifest in gene expression profiles. A whole transcriptome sequencing of LN and

102 OB myotubes revealed that lyso-PC acyltransferase 3 (LPCAT3), an enzyme of the Lands

103 cycle, was more highly expressed with obesity. These findings were recapitulated in muscle

104 biopsy samples (*not* myotubes) from LN and OB individuals as well as muscle tissue from wild-

105 type and db/db mice (Figure 1G). The Lands cycle represents a series of phospholipid-  
106 remodeling reactions by which acyl-chains become transacylated (17). Of the thirteen lyso-PL  
107 acyltransferase enzymes (20), LPCAT3 has the highest affinity for 16:0 and 18:0 lyso-PC,  
108 consistent with the specificity of reduced lyso-PC/PC (21, 22). Silencing of LPCAT3 in  
109 fibroblasts has been shown to increase Akt phosphorylation (23), while incubation of the same  
110 cells with 16:0/20:4 PC decreased Akt phosphorylation due to plasma-membrane specific  
111 effects (24). Mice with a liver-specific deletion of LPCAT3 exhibit enhanced ordering of  
112 membranes (25). In both human and mouse skeletal muscle, LPCAT3 is very highly expressed  
113 compared to other isoforms of LPCAT (Figure 1H), and skeletal muscle LPCAT3 expression is  
114 directly correlated to circulating insulin in 106 mouse strains (data not shown, bicor=0.296,  
115  $P=0.0016$ ) (26).

116

117 To study the role of LPCAT3 on skeletal muscle insulin action, we performed a lentivirus-  
118 mediated shRNA knockdown of LPCAT3 (Scrambled, SC; LPCAT3 knockdown, KD) in C2C12  
119 myotubes (Figure 2A). LPCAT3 knockdown did not affect protein content for MyoD, various  
120 MHC isoforms, and respiratory complexes (Figure S2A-C), suggesting that the deletion of  
121 LPCAT3 has no effect on myotube lineage or mitochondrial density. Targeted lipidomic  
122 analyses revealed that LPCAT3 knockdown increased lyso-PC and decreased PC (Figure  
123 2B&C), substrates and products of the LPCAT3-mediated reaction, respectively (27, 28).  
124 Together, these differences were sufficient to elevate lyso-PC/PC with LPCAT3 deletion (Figure  
125 2D). Similar effects were seen with lipid species composed of an ethanolamine head group  
126 (Figure S2D-F), while the phospholipid saturation index increased with LPCAT3 knockdown  
127 (Figure S2G). Analogous to differences observed in LN and OB HSkMC, LPCAT3 deletion  
128 reduced phospholipid head group packing (Figure 2E&F). We then incubated SC and KD cells  
129 in a submaximal concentration of insulin to assess insulin signaling events. Strikingly, inhibition  
130 of LPCAT3 robustly enhanced insulin signaling with or without insulin (Figure 2G, Figure S2H).

131 Notably, the increase occurred at the level of the insulin receptor (IR), a node that is localized in  
132 the phospholipid-rich plasma membrane. Consequently, LPCAT3 deletion enhanced insulin-  
133 stimulated glycogen synthesis (Figure 2H), suggesting that this intervention increases skeletal  
134 muscle insulin sensitivity *in vitro* (due to low GLUT4:GLUT1 stoichiometry, insulin-stimulated  
135 glucose uptake is not an ideal surrogate for insulin sensitivity in C2C12 myotubes). LPCAT3  
136 knockdown also enhanced insulin signaling in HSkMC from obese subjects (Figure 2G).

137

138 The organization and clustering of plasma membrane microdomains is linked to the induction of  
139 tyrosine-kinase signaling events, such as IR signaling (29-31). Because LPCAT3 deletion  
140 promoted enhanced insulin signaling at the level of IR phosphorylation, we visualized the  
141 organization of plasma membrane microdomains with labeling and patching of plasma  
142 membrane GM-1, a known marker of microdomains. Indeed, a greater proportion of C2C12  
143 cells with LPCAT3 knockdown exhibited clustering of GM-1 enriched microdomains (Figure 2I,  
144 top &J). Furthermore, LPCAT3 deletion decreased the size of these clusters (Figure 2I, bottom  
145 &K), with no differences in total fluorescence from each cell (Figure S2I). These data indicate  
146 that LPCAT3 inhibition induces a reorganization of plasma membrane microdomains, potentially  
147 explaining increased IR phosphorylation.

148

149 Next, we examined whether inhibition of muscle LPCAT3 would promote greater insulin  
150 sensitivity *in vivo*. Mice with tamoxifen-inducible skeletal muscle-specific knock-out of LPCAT3  
151 (LPCAT3-MKO) were generated by crossing the HSA-MerCreMer mice (34) with LPCAT3  
152 conditional knock-out mice (exon3 of the *Lpcat3* gene flanked with *loxP* sites) (25) (Figure 3A).  
153 This strategy successfully yielded mice with suppressed LPCAT3 expression in skeletal muscle  
154 without affecting other tissues (Figure 3B), and without compensatory upregulation of other  
155 members of the LPCAT family (Figure 3C). Control and LPCAT3-MKO mice gained weight  
156 equally when fed a high-fat diet (HFD, Figure 3D) with no difference in adipose tissue weight at

157 the end of diet intervention (Figure 3E). Food consumption, whole-body oxygen consumption,  
158 spontaneous activity, and respiratory exchange ratio were similarly not different between groups  
159 (Figure 3F-I). Fasting glucose, insulin, and glucose tolerance (Figure 3J-L) were unchanged, but  
160 circulating insulin during the glucose tolerance test was substantially lower in LPCAT3-MKO  
161 mice compared to the control group (Figure 3M).

162  
163 To evaluate whether improved glycemic efficiency was attributable to greater skeletal muscle  
164 insulin sensitivity, we quantified insulin-stimulated skeletal muscle glucose uptake *ex vivo*.  
165 Isolated muscles from HFD-fed control and LPCAT3-MKO mice were incubated with or without  
166 a submaximal concentration of insulin for the measurement of 2-deoxy-glucose uptake. Indeed,  
167 insulin-stimulated skeletal muscle glucose uptake was robustly enhanced in LPCAT3-MKO mice  
168 compared to control (Figure 4A). The increase in glucose uptake coincided with augmented  
169 insulin-stimulated Akt phosphorylation (Figure 4B&C), similar to C2C12 and human primary  
170 myotubes (Figure 2). These results suggest that inhibition of muscle LPCAT3 increases skeletal  
171 muscle insulin sensitivity *in vivo*. Similar to results from LPCAT3 knockdown *in vitro*, muscles  
172 from LPCAT3-MKO mice had elevated lyso-PC (16:0 and 18:0) (Figure 4D) and lower levels of  
173 PC species known to be the main products of the LPCAT3 reaction (16:0/18:2 and 16:0/22:4)  
174 (Figure 4E) (22, 35, 36). As a result, lyso-PC/PC was ~2-fold greater in LPCAT3-MKO mice  
175 compared to control (Figure 4F). In contrast, lyso-PE/PE or phospholipid saturation index was  
176 unaltered between control and LPCAT3-MKO muscles (Figure S3A-D), similar to the lipidome in  
177 LN and OB HSkMC (Figure 1&S1). Muscles from control and LPCAT3-MKO did not differ in  
178 mass, length, force-generating capacity, fiber-type distribution, or content of proteins in the  
179 electron transport chain (Figure 4G-L, Figure S3E-G).

180  
181 How does the inhibition of the Lands cycle promote greater insulin action in skeletal muscle?  
182 LPCAT3 deficiency enhanced insulin signaling at the level of IR which was concomitant with



183 altered plasma membrane lipid organization (Figure 2), suggesting that changes in plasma  
184 membrane properties may mediate the insulin-sensitizing effects. Membrane organization is  
185 vital to insulin action, as IR is localized to highly ordered microdomains on the plasma  
186 membrane (37, 38). The interaction between caveolae and IR enhances insulin signaling in  
187 other cell types (39, 40). Mice that lack caveolin-3 (*cav3*), a skeletal muscle-specific scaffolding  
188 protein critical in the formation of caveolae on the plasma membrane, exhibit skeletal muscle  
189 insulin resistance due to plasma membrane-specific effects on the IR (41, 42). Overexpression  
190 of dominant-negative *cav3* leads to decreased glucose uptake and glycogen synthesis in  
191 C2C12 cells, which is attributed to decreased Akt phosphorylation (43-45). Conversely, an  
192 increase in wildtype *cav3* expression is sufficient to enhance Akt phosphorylation and glucose  
193 uptake (46). Indeed, LPCAT3 knockdown substantially increased *cav3* content in C2C12  
194 myotubes (Figure 5A). To examine the possibility that the absence of LPCAT3 increases the  
195 abundance of lipids in caveolae, we isolated membrane fractions from C2C12 myotubes with or  
196 without LPCAT3 deletion and subjected them for further purification by density-gradient  
197 ultracentrifugation.

198  
199 Cholesterol and sphingomyelin are two classes of lipids that are more highly abundant in the  
200 detergent-resistant membrane (DRM; i.e. ordered membrane) fraction compared to the  
201 detergent-soluble membrane (DSM) fraction (47). Experiments in wild-type C2C12 myotubes  
202 indicated that fractions 4-5 have substantial amounts of total lipid (Figure S5A). These fractions  
203 were enriched in sphingomyelin and cholesterol which are known to be conducive for more  
204 highly ordered membrane (Figure S5B&C), with relatively low abundance of lipids involved in  
205 the LPCAT3-mediated reaction (Figure S5D-G). LPCAT3 knockdown did not appear to alter the  
206 overall content of lipid in the DRM fraction, nor did it affect enrichment of sphingomyelin and  
207 cholesterol (Figure 5B&C). Even though the DRM fraction is known to contain very little protein  
208 (48), we detected substantial *cav3* in both SC and KD myotubes (Figure 5D). While LPCAT3

209 deletion did not affect the proportion of cav3 in the DRM fraction, it is noteworthy that elevated  
210 cav3 content with LPCAT3 knockdown (Figure 5A) is reflected in the DRM fraction. This is  
211 particularly interesting considering there was no enrichment of sphingomyelin or cholesterol in  
212 the DRM fraction, which may have been expected given that these lipids induce sequestration  
213 of cav3 into caveolae. Consistent with this notion, LPCAT3 deletion was sufficient to elevate  
214 lyso-PC in the DRM as well as DRM fractions of the membrane (Figure 5E), with minimal effect  
215 on PC species (Figure S5A). Similar results were exhibited with lyso-PE and PE (Figure  
216 S5B&C). The saturation index of phospholipids was slightly increased in both DRM and DSM  
217 fractions, which may also contribute to the increase in the plasma membrane lipid clustering  
218 (Figure S5D). Thus, LPCAT3 deletion promotes the accumulation of lyso-PC in the DRM  
219 fraction which may contribute to membrane organization. To test our hypothesis that an  
220 increase in membrane organization mediates the insulin-sensitizing effect of LPCAT3 deletion,  
221 we incubated C2C12 myotubes with methyl-beta-cyclodextrin (M $\beta$ CD), a cholesterol-depleting  
222 compound that disrupts plasma membrane microdomains (49). Indeed, incubation of cells with  
223 M $\beta$ CD decreased cav3 protein content (Figure 5F) without decreasing the abundance of flotillin-  
224 1 (Figure 5G), a protein associated with non-caveolar microdomains. M $\beta$ CD treatment  
225 normalized insulin-stimulated Akt phosphorylation with LPCAT3 deletion to control levels (Figure  
226 5H). These findings are consistent with the notion that LPCAT3 deletion enhances IR signaling  
227 by its effect on plasma membrane organization.

228

229 CI-976 is a pan lysophospholipid acyltransferase inhibitor (32, 33) that has the ability to disrupt  
230 Lands cycle, similar to LPCAT3 deletion. To examine a possibility that the insulin-sensitizing  
231 effect of LPCAT3 knockdown is attributable to an unknown function of LPCAT3 outside of the  
232 Lands cycle, we studied C2C12 myotubes with or without CI-976. Consistent with our findings  
233 with LPCAT3 knockdown (Figure 2E&F), pre-incubation of wild-type C2C12 myotubes with CI-  
234 976 robustly decreased phospholipid headgroup packing (Figure 5I). Strikingly, CI-976 also

235 promoted an increase in insulin-stimulated Akt phosphorylation compared to vehicle control  
236 (Figure 5J). These evidence support our findings that inhibition of Lands cycle alter plasma  
237 membrane property to increase skeletal muscle insulin sensitivity.

238

## 239 **Discussion**

240 Obesity promotes aberrant lipid metabolism in various tissues including skeletal muscle where it  
241 dampens its ability to respond to circulating insulin and increase glucose uptake. Studies in  
242 model organisms have led to the identification of lipotoxic lipids that might promote insulin  
243 resistance in various tissues (50, 51), but some studies were unable to validate these  
244 mechanisms in human muscles (52, 53). To gain a global understanding of changes that occur  
245 in muscle lipid metabolism with human obesity, we conducted lipidomic analyses on muscle  
246 samples from LN and OB subjects. Obesity was associated with decreases in various species of  
247 lysophospholipids, an observation that had never been previously reported. Many of these lipids  
248 are generated by the enzymes of the Lands cycle, which removes fatty-acyl chains at the sn-2  
249 position of phospholipids to generate lysophospholipids (Lands cycle). We propose a novel  
250 mechanism by which obesity accelerates the skeletal muscle Lands cycle to promote insulin  
251 resistance.

252

253 The acceleration of muscle phospholipid transacylation was apparently driven by increased  
254 LPCAT3 expression, likely attributable to diet-induced activation of LXRs and PPARs (22, 54,  
255 55). The inhibition of LPCAT3 enhances insulin signaling at the level of IR to improve skeletal  
256 muscle insulin sensitivity. We believe that the insulin-sensitizing effect of Lands cycle inhibition  
257 is mediated by its effect on the plasma membrane lipid organization (Figure 6). Consistent with  
258 this notion, LPCAT3 deletion and/or CI-976 treatment was sufficient to alter membrane  
259 phospholipid packing, GM1-microdomain clustering, cav3 content and lipid composition of  
260 detergent-resistant and -soluble membranes. Furthermore, disruption of cholesterol-rich

261 microdomains was sufficient to eliminate the insulin-sensitizing effect of LPCAT3 inhibition.  
262 Interventions that interfere with the plasma membrane organization would be predicted to have  
263 effects on other cellular events, but the deletion of LPCAT3 did not appear to have an overly  
264 adverse effect on skeletal muscle, including mass, fiber-type or force-generating capacity. It  
265 would be of substantial interest to pursue implications of altered Lands cycle and/or plasma  
266 membrane organization in the context of other cellular events including signaling through other  
267 receptor tyrosine kinases.

268

269 Observations in this study open up a potential opportunity to pharmacologically target this  
270 pathway (such as with CI-976) to enhance skeletal muscle insulin sensitivity and improve whole-  
271 body glucose homeostasis. It is noteworthy that the current study partly drew its conclusions  
272 from lipidomic analyses and loss-of-function studies performed in human samples, suggesting  
273 that this mechanism may be directly involved in the pathogenesis of skeletal muscle insulin  
274 resistance in human obesity. We are also interested in examining whether obesity induces  
275 similar changes in plasma membrane organization of other tissues to promote pathology.

276

277

278 **Methods**

279 ***Human Subjects***

280 All participants were prescreened to be free of any known metabolic diseases or heart  
281 conditions, nontobacco users, not taking any medications known to alter metabolism, and  
282 sedentary. Six lean subjects without diabetes (LN: BMI < 25 kg/m<sup>2</sup>) and six subjects with severe  
283 obesity (OB: BMI > 40 kg/m<sup>2</sup>) were studied (all Caucasian females). The subjects were  
284 instructed not to exercise for approximately 48h before the muscle biopsy. A fasting blood  
285 sample (glucose and insulin) and muscle biopsy from the vastus lateralis were collected. A  
286 portion of the biopsy sample was frozen immediately, and another portion was used to isolate  
287 primary muscle cells.

288

289 ***Cell Culture***

290 Primary human skeletal muscle cells (HSkMC) were isolated from fresh muscle biopsies as  
291 previously described (15, 56). HSkMC were cultured in growth media containing low glucose  
292 DMEM, 10x FBS, 0.5 mg/mL BSA, 0.5 mg/mL fetuin, 10 ng/mL human EGF, 1 μM  
293 dexamethasone, and 0.1% penicillin-streptomycin. HSkMC were differentiated in low glucose  
294 DMEM, 2% horse serum, 0.5 mg/mL BSA, 0.5 mg/mL fetuin, and 0.1% penicillin-streptomycin.  
295 C2C12 myoblasts were grown in high glucose DMEM (4.5 g/L glucose, [+]L-Glutamine; Gibco  
296 11965-092) supplemented with 10% FBS (Heat Inactivated, Certified, US Origin; Gibco 10082-  
297 147), and 0.1% penicillin-streptomycin (10,000 U/mL; Gibco 15140122). C2C12 cells were  
298 differentiated into myotubes with low glucose DMEM (1 g/L glucose, [+]L-Glutamine, [+]110  
299 mg/L sodium pyruvate; Gibco 11885-084) supplemented with 2% horse serum (Defined; VWR  
300 16777), and 0.1% penicillin-streptomycin. For experiments with CI-976 C2C12 myoblasts were  
301 differentiated with either 10 μM of CI-976 or equal volume DMSO (vehicle). For experiments  
302 with methyl-beta-cyclodextrin cells were incubated with 10 mM (1320 g/mole) for 1 hour directly

303 dissolved into media. Prior to all experiments cells were serum-starved for 3 hours in low  
304 glucose DMEM containing 1% BSA and 0.1% penicillin-streptomycin.

305

### 306 ***Quantitative-RT-PCR***

307 Samples were homogenized in TRIzol reagent (Life Technologies, Grand Island, NY) to extract  
308 total RNA. 1 µg RNA was reverse transcribed using IScript™ cDNA synthesis kit (Biorad,  
309 Hercules, CA). RT-PCR was performed with the Viia™ 7 Real-Time PCR System (Life  
310 Technologies, Grand Island, NY) using SYBR® Green reagent (Life Technologies, Grand  
311 Island, NY). All data were normalized to ribosomal L32 gene expression and primer sequences  
312 are provided (Extended Data Table 2).

313

### 314 ***Mass Spectrometry***

315 Global lipidomic analyses for LN and OB HSkMC were performed at the Mass Spectrometry  
316 Resource at the Washington University School of Medicine (15). Extracted lipids with internal  
317 standards were analyzed with a Thermo Vantage triple-quadrupole mass spectrometer or a  
318 Thermo Trace GC Ultra mass spectrometer. Targeted lipidomic analyses for C2C12 myotubes  
319 and mouse skeletal muscles were conducted in the Metabolomics Core at the University of Utah  
320 (57-59). Extracted lipids with internal standards were analyzed with an Agilent triple-quadrupole  
321 mass spectrometer. The quantity of each lipid species was normalized to total lipid content for  
322 DRM/DSM experiments or to the total protein content for all others. The phospholipid saturation  
323 index was quantified by multiplying the relative abundance of each phospholipid species by the  
324 total number of double bonds in the acyl chains of that species.

325

### 326 ***Merocyanine 540***

327 Merocyanine 540 (MC540) measurements were taken as previously described (60). In short,  
328 skeletal muscle cells (C2C12 and HSkMC) were fully differentiated and 2 million were used for

329 measurements. Cells were washed with Hanks Balanced Salt Solution (HBSS; Gibco  
330 14025092) prior to re-suspension in a cuvette with HBSS. MC540 in DMSO was added at a final  
331 concentration of 0.2  $\mu$ M and after a 10-minute dark incubation, an emission scan was performed  
332 ranging from 550-750 nm with fluorescence excitation set at 540 nm on a PTI QuantaMaster  
333 6000 Fluorimeter.

334

### 335 ***Lentivirus-Mediated Knockdown of LPCAT3***

336 LPCAT3 expression was decreased using pLKO.1 lentiviral-RNAi system. Plasmids encoding  
337 shRNA for mouse LPCAT3 (shLPCAT3: TRCN0000121437) were obtained from Sigma (St.  
338 Louis, MO). Packaging vector psPAX2 (ID #12260), envelope vector pMD2.G (ID #12259) and  
339 scrambled shRNA plasmid (sc: ID1864) were obtained from Addgene (Cambridge, MA).  
340 HEK293T cells in 10 cm dishes were transfected using 50 $\mu$ L 0.1% Polyethylenimine, 200 $\mu$ L  
341 0.15 M Sodium Chloride, and 500  $\mu$ L Opti-MEM ([+] HEPES, [+] 2.4 g/L Sodium Bicarbonate, [+]  
342 L-Glutamine; Gibco 31985) with 2.66  $\mu$ g of psPAX2, 0.75  $\mu$ g of pMD2.G, and 3  $\mu$ g of either  
343 scrambled or LPCAT3 shRNA plasmid. After 48 hours, growth media was collected, filtered  
344 using 0.22  $\mu$ m vacuum filters, and used to treat undifferentiated HSkMC or C2C12 cells for 48  
345 hours. To ensure only cells infected with shRNA vectors were viable, cells were selected with  
346 puromycin throughout differentiation.

347

### 348 ***Western Blot***

349 Whole muscle or cells were homogenized and Western blots were performed as previously  
350 described (56). Protein homogenates were analyzed for abundance of phosphorylated(Tyr972)-  
351 insulin receptor (Invitrogen: 44-800G), insulin receptor- $\beta$  (Cell Signaling: 3020S),  
352 phosphorylated(Thr308)-Akt (Cell Signaling: 9275S), phosphorylated(Ser472)-Akt (Cell  
353 Signaling: 9271L), Akt (Cell Signaling: 9272S), phosphorylated(Thr642)-AS160 (Cell Signaling:  
354 8881), AS160 (Millipore Sigma: 07-741), MyoD (DSHB: D7F2), mitochondrial complexes I-V

355 (Abcam: ab110413), MHC type I (DSHB: A4.840), MHC type IIa (DSHB: SC-71), MHC type IIx  
356 (DSHB: 6H1), MHC type IIb (DSHB: BF-F3), MHC neo (DSHB: N1.551), MHC emb (DSHB: BF-  
357 G6), Caveolin-3 (BD Biosciences: 610-420), Na/K ATPase (Cell Signaling: 3010S), Flotillin-1  
358 (Cell Signaling: 3253), and actin (Millipore Sigma: A2066).

359

### 360 ***Glycogen Synthesis***

361 The glycogen synthesis rate was quantified as previously described (61, 62). Briefly, cells were  
362 incubated in media containing D-[U-<sup>14</sup>C] glucose with (12 nM) or without insulin for 2h at 37 °C.  
363 Cells were then washed with ice-cold PBS and homogenized for 1h with 0.05% SDS. Part of the  
364 lysate was used for a protein assay and the other was combined with 2mg carrier glycogen and  
365 incubated at 100 °C for 1h. Ice cold ethanol (100%) was added to the boiled samples prior to  
366 overnight rocking at 4 °C. Samples were then centrifuged at 11,000 xG for 15 min at 4 °C to  
367 pellet glycogen. Pellets were re-suspended in de-ionized H<sub>2</sub>O and glycogen synthesis was  
368 calculated with liquid scintillation.

369

### 370 ***Generation of LPCAT3 Skeletal Muscle-Specific Knock Out Mice***

371 Conditional LPCAT3 knock out (LPCAT3cKO<sup>+/+</sup>) mice were previously generated by flanking  
372 exon3 of the *Lpcat3* gene with *loxP* sites (25). LPCAT3cKO<sup>+/+</sup> mice were then crossed with  
373 tamoxifen-inducible, skeletal muscle-specific Cre-recombinase (HSA-MerCreMer<sup>+/-</sup>)(34) mice to  
374 generate LPCAT3cKO<sup>+/+</sup>;HSA-MerCreMer<sup>-/-</sup> (Control; Ctrl) and LPCAT3cKO<sup>+/+</sup>;HSA-  
375 MerCreMer<sup>+/-</sup> (LPCAT3 Muscle-specific Knock-Out; LPCAT3-MKO). Tamoxifen injected (7.5  
376 µg/g body mass, 5 consecutive days) control and LPCAT3-MKO littermates were used for all  
377 experiments. Mice were maintained on a 12 h light/dark cycle in a temperature-controlled room.  
378 Prior to all terminal experiments and tissue harvesting, mice were given an intraperitoneal  
379 injection of 80 mg/kg ketamine and 10 mg/kg xylazine.

380



381 ***Glucose Tolerance Test***

382 Intra-peritoneal glucose tolerance tests were performed by injecting 1 mg glucose/g body mass.  
383 Mice were fasted for 4 hours prior to glucose injection. Blood glucose was measured prior to  
384 glucose injection and 15, 30, 60, and 120 minutes post-injection via tail bleed with a handheld  
385 glucometer (Bayer Contour 7151H). In a separate set of experiments, mice were injected with 1  
386 mg glucose/g body mass and blood was taken from the facial vein at the 30-minute time point  
387 for insulin quantification.

388

389 ***Serum Insulin and Glucose Quantification***

390 Blood was collected from the facial vein either prior to anesthesia or at the 30-minute time point  
391 of the glucose tolerance test. Blood was then placed at room temperature for 20 minutes to  
392 allow for clotting before centrifugation at 2,000 xG for 10 minutes at 4°C. The supernatant  
393 (serum) was placed in a separate tube and stored at -80 °C until analysis.

394 Serum glucose was quantified using a colorimetric assay. A glucose standard curve was  
395 generated (Millipore Sigma, G6918) and serum samples were mixed with a PGO enzyme  
396 (Millipore Sigma, P7119) and colorimetric substrate (Millipore Sigma, F5803) and measured at  
397 OD450 on a plate reader. Serum insulin was quantified using an insulin mouse serum kit  
398 (CisBio, 62IN3PEF) using Fluorescence Resonance Energy Transfer on a plate reader  
399 (ThermoFisher, Varioskan LUX).

400

401 ***[<sup>3</sup>H]2-Deoxy-D-Glucose Uptake***

402 *Ex vivo* glucose uptake was measured in the soleus muscle as previously described (63, 64). In  
403 brief, soleus muscles were dissected and placed in a recovery buffer (KHB with 0.1% BSA, 8  
404 mM glucose, and 2 mM mannitol) at 37 °C for 10 minutes. After incubation in recovery buffer,  
405 muscles were moved to pre-incubation buffer (KHB with 0.1% BSA, 2 mM sodium pyruvate, and  
406 6 mM mannitol) ± 200 µU/mL insulin for 15 minutes. After pre-incubation muscles were placed

407 in incubation buffer (KHB with 0.1% BSA, 9 mM [<sup>14</sup>C]mannitol, 1 mM [<sup>3</sup>H]2-deoxyglucose) ± 200  
408 μU/mL insulin for 15 minutes. Contralateral muscles were used for basal or insulin-stimulated  
409 measurements. After incubation muscles were blotted dry on ice-cold filter paper, snap-frozen,  
410 and stored at -80 °C until analyzed with liquid scintillation counting.

411

### 412 ***Muscle Force Generation***

413 Force generating properties of extensor digitorum longus (EDL) muscles were measured as  
414 previously described (65). Briefly, EDL muscles were sutured at each tendon and muscles were  
415 suspended at optimal length ( $L_o$ ) which was determined by pulse stimulation. After  $L_o$  was  
416 identified muscles were stimulated (0.35 s, pulse width 0.2 ms) at frequencies ranging from 10-  
417 200 Hz. Muscle length and mass were measured to quantify CSA (66-68) for force  
418 normalization.

419

### 420 ***Muscle Immunohistochemistry***

421 Frozen, OCT-embedded hind limb muscle samples (tibialis anterior or EDL) were sectioned at  
422 10μm using a cryostat (Microtome Plus™). Following 1h blocking with M.O.M mouse IgG  
423 blocking (Vector: MKB-2213), myofiber sections were incubated for 1h with concentrated  
424 BA.D5, SC.71, and BF.F3 (all 1:100; DSHB) and laminin (1:200; Millipore Sigma: L9393) in  
425 2.5% normal horse serum. To visualize laminin (for fiber border), myosin heavy chain I (MHC I),  
426 myosin heavy chain IIa (MHC IIa), and myosin heavy chain IIb (MHC IIb), slides were incubated  
427 for 1h with the following secondaries: AMCA (1:250 Vector: CI-1000), Alexa Fluor 647 (1:250;  
428 Invitrogen: A21242), Alexa Fluor 488 (1:500; Invitrogen: A21121) and Alexa Fluor 555 (1:500;  
429 Invitrogen: A21426), respectively. Negatively stained fibers were considered myosin heavy  
430 chain IIx (MHC IIx). After staining, slides were coverslipped with mounting media (Vector: H-  
431 1000). Stained slides were imaged with a fully automated wide-field light microscope (Nikon,

432 Nikon Corp.; Tokyo, Japan) with a 10X objective lens. Images were captured using high  
433 sensitivity Andor Clara CCD (Belfast, UK).

434

#### 435 ***GM-1 Labeling and Imaging***

436 GM-1 clusters were labeled using a Vybrant® Alexa Fluor® 488 Lipid Raft Labeling Kit  
437 (ThermoFisher Scientific: V34404) as previously described (69). Briefly, 2 million myotubes  
438 were incubated 1mL in ice-cold starvation media with 0.8µg/mL fluorescent cholera toxin subunit  
439 B conjugate (CT-B) for 10 minutes. CT-B conjugates were then cross-linked with an anti-CT-B  
440 antibody (1:200) in ice-cold starvation media for 15 minutes. Cells were fixed for 1 h at 4 °C in  
441 ice-cold 4% paraformaldehyde in PBS in dark. Between each step, cells were washed 2x in ice-  
442 cold PBS. Cells were imaged on an Olympus FV1000 confocal microscope (2.5x, HV:600,  
443 offset: 30). Images were processed using NIH ImageJ. All images were background subtracted  
444 with a rolling ball radius of 50 pixels. Images were blindly scored by S.R.S and K.F. as exhibiting  
445 clustering of microdomains or non-clustering. Images were then subjected to color thresholding  
446 using the Otsu method (70, 71) (designed for thresholding images for cluster analyses) and  
447 made binary. A particle analysis of all particles that were  $>0.1\mu\text{m}^2$  was performed to determine  
448 the average cluster size for each cell that was imaged (72). For each experiment, 35-50 cells  
449 per group were analyzed and the median was taken as a representative of that experiment.

450

#### 451 ***Detergent-Resistant Membrane Isolation***

452 Detergent-resistant membranes (DRM) and detergent-soluble membranes (DSM) were isolated  
453 as previously described (72). Briefly, 2x15 cm plates of cells were scraped in ice-cold PBS and  
454 then pelleted. Cells were re-suspended in 1mL of cold homogenization buffer (Mes-buffered  
455 saline [MBS], 1% Triton-X wt/v, and protease and phosphatase inhibitor) and passed through a  
456 23-gauge needle 6 times before incubating at 4 °C for 30 minutes. MBS was added to the  
457 homogenate until a volume of 2.5 mL was reached then mixed with 2.5 mL of 90% sucrose in

458 MBS and 4mL of this mixture was added to an ultracentrifuge tube (Beckman Coulter 344061).

459 A sucrose gradient was generated by adding 4 mL 35% sucrose followed by 4mL of 5%

460 sucrose. Samples were then centrifuged at 100,000 xG at 4 °C for 20 hours in a swinging

461 bucket rotor (Beckman L8-M Ultracentrifuge, SW28 Rotor).

462

### 463 **Statistics**

464 Statistical analysis was performed using Prism 7 software (GraphPad). Student's t-tests were

465 performed with data composed of 2 groups and 2-way ANOVA for multiple groups followed by

466 Sidak's multiple comparison test. All data are Mean±SEM and statistical significance was set at

467  $P < 0.05$ .

468

### 469 **Study Approval**

470 The experimental protocol was approved by the Internal Review Board for Human Research at

471 East Carolina University. Informed consent was obtained prior to inclusion in the study.

472 Animal experiments were approved by the University of Utah Institutional Animal Care and Use

473 Committee.

474

### 475 **Author contributions**

476 P.J.F. and K.F. contributed to study concept design and wrote the manuscript. J.A.H. performed

477 human muscle biopsies. J.M.J. contributed to study concept and design and data analysis. X.R.

478 and P.T. developed LPCAT3 conditional knock-out mice. J.A.M., J.E.C., H.S., and J.T.

479 performed mass spectrometry analyses. P.J.F., K.F., and S.R.S. performed analyses of the

480 physical properties of phospholipid membranes. A.R.P.V. and P.J.F. performed analysis of

481 muscle force production. P.S. performed muscle histology measurements. P.J.F. performed all

482 biochemical assays and metabolic phenotyping measurements. K.C.K. and A.J.L. performed

483 correlation analyses with 106 mouse strains. J.A.H., P.T., J.T., J.E.C., and S.R.S. edited the  
484 manuscript.

485

#### 486 **Acknowledgments**

487 This work was supported by NIH grants DK107397, DK109888, AG063077 (to K.F.), HL030568,  
488 HL030568, HL136618 (to P.T.), AT006122, HL123647 (to S.R.S.), HL028481, HL030568 (to  
489 A.J.L.), and DK056112 (to J.A.H.), American Heart Association 18PRE33960491 (to A.R.P.V.),  
490 American Heart Association 19PRE34380991 (to J.M.J.), and the Larry H. and Gail Miller  
491 Family Foundation (to P.J.F). The University of Utah Metabolomics, Mass Spectrometry, and  
492 Proteomics core is supported by S10 OD016232, S10 OD021505, and U54 DK110858. The  
493 Washington University Biomedical MS Resource is supported by United States Public Health  
494 Services grants P41-GM103422, P30-DK020579, and P30-DK056341.

495 **References**

- 496 1. Heron M. Deaths: Leading Causes for 2017. *National Vital Statistics Reports*.  
497 2019;68(6).
- 498 2. Huo X, Gao L, Guo L, Xu W, Wang W, Zhi X, Li L, Ren Y, Qi X, Sun Z, et al. Risk of non-  
499 fatal cardiovascular diseases in early-onset versus late-onset type 2 diabetes in China: a  
500 cross-sectional study. *Lancet Diabetes Endocrinol*. 2016;4(2):115-24.
- 501 3. DeFronzo RA, Jacot E, Jequier E, Maeder E, Wahren J, and Felber JP. The effect of  
502 insulin on the disposal of intravenous glucose. Results from indirect calorimetry and  
503 hepatic and femoral venous catheterization. *Diabetes*. 1981;30(12):1000-7.
- 504 4. Thiebaud D, Jacot E, DeFronzo RA, Maeder E, Jequier E, and Felber JP. The effect of  
505 graded doses of insulin on total glucose uptake, glucose oxidation, and glucose storage  
506 in man. *Diabetes*. 1982;31(11):957-63.
- 507 5. DeFronzo RA, and Tripathy D. Skeletal muscle insulin resistance is the primary defect in  
508 type 2 diabetes. *Diabetes Care*. 2009;32 Suppl 2(S157-63).
- 509 6. Dube JJ, Coen PM, DiStefano G, Chacon AC, Helbling NL, Desimone ME, Stefanovic-  
510 Racic M, Hames KC, Despines AA, Toledo FG, et al. Effects of acute lipid overload on  
511 skeletal muscle insulin resistance, metabolic flexibility, and mitochondrial performance.  
512 *Am J Physiol Endocrinol Metab*. 2014;307(12):E1117-24.
- 513 7. Manco M, Mingrone G, Greco AV, Capristo E, Gniuli D, De Gaetano A, and Gasbarrini  
514 G. Insulin resistance directly correlates with increased saturated fatty acids in skeletal  
515 muscle triglycerides. *Metabolism*. 2000;49(2):220-4.
- 516 8. Lee JS, Pinnamaneni SK, Eo SJ, Cho IH, Pyo JH, Kim CK, Sinclair AJ, Febbraio MA,  
517 and Watt MJ. Saturated, but not n-6 polyunsaturated, fatty acids induce insulin  
518 resistance: role of intramuscular accumulation of lipid metabolites. *J Appl Physiol (1985)*.  
519 2006;100(5):1467-74.
- 520 9. Chavez JA, and Summers SA. Characterizing the effects of saturated fatty acids on  
521 insulin signaling and ceramide and diacylglycerol accumulation in 3T3-L1 adipocytes  
522 and C2C12 myotubes. *Arch Biochem Biophys*. 2003;419(2):101-9.
- 523 10. Bergman BC, Hunerdosse DM, Kerege A, Playdon MC, and Perreault L. Localisation  
524 and composition of skeletal muscle diacylglycerol predicts insulin resistance in humans.  
525 *Diabetologia*. 2012;55(4):1140-50.
- 526 11. Perreault L, Newsom SA, Strauss A, Kerege A, Kahn DE, Harrison KA, Snell-Bergeon  
527 JK, Nemkov T, D'Alessandro A, Jackman MR, et al. Intracellular localization of  
528 diacylglycerols and sphingolipids influences insulin sensitivity and mitochondrial function  
529 in human skeletal muscle. *JCI Insight*. 2018;3(3).
- 530 12. Adams JM, 2nd, Pratipanawat T, Berria R, Wang E, DeFronzo RA, Sullards MC, and  
531 Mandarino LJ. Ceramide content is increased in skeletal muscle from obese insulin-  
532 resistant humans. *Diabetes*. 2004;53(1):25-31.
- 533 13. Schmitz-Peiffer C, Craig DL, and Biden TJ. Ceramide generation is sufficient to account  
534 for the inhibition of the insulin-stimulated PKB pathway in C2C12 skeletal muscle cells  
535 pretreated with palmitate. *J Biol Chem*. 1999;274(34):24202-10.
- 536 14. Itani SI, Ruderman NB, Schmieder F, and Boden G. Lipid-induced insulin resistance in  
537 human muscle is associated with changes in diacylglycerol, protein kinase C, and  
538 I $\kappa$ B- $\alpha$ . *Diabetes*. 2002;51(7):2005-11.
- 539 15. Paran CW, Verkerke AR, Heden TD, Park S, Zou K, Lawson HA, Song H, Turk J,  
540 Houmard JA, and Funai K. Reduced efficiency of sarcolipin-dependent respiration in  
541 myocytes from humans with severe obesity. *Obesity (Silver Spring)*. 2015;23(7):1440-9.
- 542 16. Hulver MW, Berggren JR, Carper MJ, Miyazaki M, Ntambi JM, Hoffman EP, Thyfault JP,  
543 Stevens R, Dohm GL, Houmard JA, et al. Elevated stearoyl-CoA desaturase-1

- 544 expression in skeletal muscle contributes to abnormal fatty acid partitioning in obese  
545 humans. *Cell Metab.* 2005;2(4):251-61.
- 546 17. Lands WE. Metabolism of glycerolipides; a comparison of lecithin and triglyceride  
547 synthesis. *J Biol Chem.* 1958;231(2):883-8.
- 548 18. Fink KL, and Gross RW. Modulation of canine myocardial sarcolemmal membrane  
549 fluidity by amphiphilic compounds. *Circ Res.* 1984;55(5):585-94.
- 550 19. Bing RJ, Termin A, Conforto A, Dudek R, and Hoffmann MJ. Membrane function and  
551 vascular reactivity. *Biosci Rep.* 1993;13(2):61-7.
- 552 20. Hishikawa D, Hashidate T, Shimizu T, and Shindou H. Diversity and function of  
553 membrane glycerophospholipids generated by the remodeling pathway in mammalian  
554 cells. *J Lipid Res.* 2014;55(5):799-807.
- 555 21. Kazachkov M, Chen Q, Wang L, and Zou J. Substrate preferences of a  
556 lysophosphatidylcholine acyltransferase highlight its role in phospholipid remodeling.  
557 *Lipids.* 2008;43(10):895-902.
- 558 22. Zhao Y, Chen YQ, Bonacci TM, Bredt DS, Li S, Bensch WR, Moller DE, Kowala M,  
559 Konrad RJ, and Cao G. Identification and characterization of a major liver  
560 lysophosphatidylcholine acyltransferase. *J Biol Chem.* 2008;283(13):8258-65.
- 561 23. Pein H, Koeberle SC, Voelkel M, Schneider F, Rossi A, Thurmer M, Loeser K, Sautebin  
562 L, Morrison H, Werz O, et al. Vitamin A regulates Akt signaling through the phospholipid  
563 fatty acid composition. *FASEB J.* 2017;31(10):4566-77.
- 564 24. Koeberle A, Shindou H, Koeberle SC, Laufer SA, Shimizu T, and Werz O. Arachidonoyl-  
565 phosphatidylcholine oscillates during the cell cycle and counteracts proliferation by  
566 suppressing Akt membrane binding. *Proc Natl Acad Sci U S A.* 2013;110(7):2546-51.
- 567 25. Rong X, Wang B, Dunham MM, Hedde PN, Wong JS, Gratton E, Young SG, Ford DA,  
568 and Tontonoz P. Lpcat3-dependent production of arachidonoyl phospholipids is a key  
569 determinant of triglyceride secretion. *Elife.* 2015;4(
- 570 26. Parks BW, Sallam T, Mehrabian M, Psychogios N, Hui ST, Norheim F, Castellani LW,  
571 Rau CD, Pan C, Phun J, et al. Genetic architecture of insulin resistance in the mouse.  
572 *Cell Metab.* 2015;21(2):334-47.
- 573 27. Eto M, Shindou H, Koeberle A, Harayama T, Yanagida K, and Shimizu T.  
574 Lysophosphatidylcholine acyltransferase 3 is the key enzyme for incorporating  
575 arachidonic acid into glycerophospholipids during adipocyte differentiation. *Int J Mol Sci.*  
576 2012;13(12):16267-80.
- 577 28. Martin SA, Gijon MA, Voelker DR, and Murphy RC. Measurement of lysophospholipid  
578 acyltransferase activities using substrate competition. *J Lipid Res.* 2014;55(4):782-91.
- 579 29. Li S, Song KS, and Lisanti MP. Expression and characterization of recombinant  
580 caveolin. Purification by polyhistidine tagging and cholesterol-dependent incorporation  
581 into defined lipid membranes. *J Biol Chem.* 1996;271(1):568-73.
- 582 30. Murata M, Peranen J, Schreiner R, Wieland F, Kurzchalia TV, and Simons K.  
583 VIP21/caveolin is a cholesterol-binding protein. *Proc Natl Acad Sci U S A.*  
584 1995;92(22):10339-43.
- 585 31. Janes PW, Ley SC, and Magee AI. Aggregation of lipid rafts accompanies signaling via  
586 the T cell antigen receptor. *J Cell Biol.* 1999;147(2):447-61.
- 587 32. Chambers K, and Brown WJ. Characterization of a novel CI-976-sensitive  
588 lysophospholipid acyltransferase that is associated with the Golgi complex. *Biochem*  
589 *Biophys Res Commun.* 2004;313(3):681-6.
- 590 33. Chambers K, Judson B, and Brown WJ. A unique lysophospholipid acyltransferase  
591 (LPAT) antagonist, CI-976, affects secretory and endocytic membrane trafficking  
592 pathways. *J Cell Sci.* 2005;118(Pt 14):3061-71.
- 593 34. McCarthy JJ, Srikuea R, Kirby TJ, Peterson CA, and Esser KA. Inducible Cre transgenic  
594 mouse strain for skeletal muscle-specific gene targeting. *Skelet Muscle.* 2012;2(1):8.

- 595 35. Hishikawa D, Shindou H, Kobayashi S, Nakanishi H, Taguchi R, and Shimizu T.  
596 Discovery of a lysophospholipid acyltransferase family essential for membrane  
597 asymmetry and diversity. *Proc Natl Acad Sci U S A*. 2008;105(8):2830-5.
- 598 36. Gijon MA, Riekhof WR, Zarini S, Murphy RC, and Voelker DR. Lysophospholipid  
599 acyltransferases and arachidonate recycling in human neutrophils. *J Biol Chem*.  
600 2008;283(44):30235-45.
- 601 37. Vainio S, Heino S, Mansson JE, Fredman P, Kuismanen E, Vaarala O, and Ikonen E.  
602 Dynamic association of human insulin receptor with lipid rafts in cells lacking caveolae.  
603 *EMBO Rep*. 2002;3(1):95-100.
- 604 38. Foti M, Porcheron G, Fournier M, Maeder C, and Carpentier JL. The neck of caveolae is  
605 a distinct plasma membrane subdomain that concentrates insulin receptors in 3T3-L1  
606 adipocytes. *Proc Natl Acad Sci U S A*. 2007;104(4):1242-7.
- 607 39. Kabayama K, Sato T, Saito K, Loberto N, Prinetti A, Sonnino S, Kinjo M, Igarashi Y, and  
608 Inokuchi J. Dissociation of the insulin receptor and caveolin-1 complex by ganglioside  
609 GM3 in the state of insulin resistance. *Proc Natl Acad Sci U S A*. 2007;104(34):13678-  
610 83.
- 611 40. Hahn-Obercyger M, Graeve L, and Madar Z. A high-cholesterol diet increases the  
612 association between caveolae and insulin receptors in rat liver. *J Lipid Res*.  
613 2009;50(1):98-107.
- 614 41. Capozza F, Combs TP, Cohen AW, Cho YR, Park SY, Schubert W, Williams TM,  
615 Brasaemle DL, Jelicks LA, Scherer PE, et al. Caveolin-3 knockout mice show increased  
616 adiposity and whole body insulin resistance, with ligand-induced insulin receptor  
617 instability in skeletal muscle. *Am J Physiol Cell Physiol*. 2005;288(6):C1317-31.
- 618 42. Oshikawa J, Otsu K, Toya Y, Tsunematsu T, Hankins R, Kawabe J, Minamisawa S,  
619 Umemura S, Hagiwara Y, and Ishikawa Y. Insulin resistance in skeletal muscles of  
620 caveolin-3-null mice. *Proc Natl Acad Sci U S A*. 2004;101(34):12670-5.
- 621 43. Deng YF, Huang YY, Lu WS, Huang YH, Xian J, Wei HQ, and Huang Q. The Caveolin-3  
622 P104L mutation of LGMD-1C leads to disordered glucose metabolism in muscle cells.  
623 *Biochem Biophys Res Commun*. 2017;486(2):218-23.
- 624 44. Shang L, Chen T, Xian J, Deng Y, Huang Y, Zhao Q, Liang G, Liang Z, Lian F, Wei H, et  
625 al. The caveolin-3 P104L mutation in LGMD-1C patients inhibits non-insulin-stimulated  
626 glucose metabolism and growth but promotes myocyte proliferation. *Cell Biol Int*.  
627 2019;43(6):669-77.
- 628 45. Huang Y, Deng Y, Shang L, Yang L, Huang J, Ma J, Liao X, Zhou H, Xian J, Liang G, et  
629 al. Effect of type 2 diabetes mellitus caveolin-3 K15N mutation on glycometabolism. *Exp*  
630 *Ther Med*. 2019;18(4):2531-9.
- 631 46. Shang L, Chen T, Deng Y, Huang Y, Huang Y, Xian J, Lu W, Yang L, and Huang Q.  
632 Caveolin-3 promotes glycometabolism, growth and proliferation in muscle cells. *PLoS*  
633 *One*. 2017;12(12):e0189004.
- 634 47. Simons K, and Toomre D. Lipid rafts and signal transduction. *Nat Rev Mol Cell Biol*.  
635 2000;1(1):31-9.
- 636 48. Galbiati F, Engelman JA, Volonte D, Zhang XL, Minetti C, Li M, Hou H, Jr., Kneitz B,  
637 Edelman W, and Lisanti MP. Caveolin-3 null mice show a loss of caveolae, changes in  
638 the microdomain distribution of the dystrophin-glycoprotein complex, and t-tubule  
639 abnormalities. *J Biol Chem*. 2001;276(24):21425-33.
- 640 49. Uhles S, Moede T, Leibiger B, Berggren PO, and Leibiger IB. Isoform-specific insulin  
641 receptor signaling involves different plasma membrane domains. *J Cell Biol*.  
642 2003;163(6):1327-37.
- 643 50. Shulman GI. Cellular mechanisms of insulin resistance. *The Journal of clinical*  
644 *investigation*. 2000;106(2):171-6.



- 645 51. Chavez JA, and Summers SA. A ceramide-centric view of insulin resistance. *Cell Metab.*  
646 2012;15(5):585-94.
- 647 52. Kien CL, Bunn JY, Poynter ME, Stevens R, Bain J, Ikayeva O, Fukagawa NK,  
648 Champagne CM, Crain KI, Koves TR, et al. A lipidomics analysis of the relationship  
649 between dietary fatty acid composition and insulin sensitivity in young adults. *Diabetes.*  
650 2013;62(4):1054-63.
- 651 53. Timmers S, Nabben M, Bosma M, van Bree B, Lenaers E, van Beurden D, Schaart G,  
652 Westerterp-Plantenga MS, Langhans W, Hesselink MK, et al. Augmenting muscle  
653 diacylglycerol and triacylglycerol content by blocking fatty acid oxidation does not  
654 impede insulin sensitivity. *Proc Natl Acad Sci U S A.* 2012;109(29):11711-6.
- 655 54. Demeure O, Lecerf F, Duby C, Desert C, Ducheix S, Guillou H, and Lagarrigue S.  
656 Regulation of LPCAT3 by LXR. *Gene.* 2011;470(1-2):7-11.
- 657 55. Yamazaki T, Hirose A, Sakamoto T, Okazaki M, Mitsumoto A, Kudo N, and Kawashima  
658 Y. Peroxisome proliferators attenuate free arachidonic acid pool in the kidney through  
659 inducing lysophospholipid acyltransferases. *J Pharmacol Sci.* 2009;111(2):201-10.
- 660 56. Heden TD, Ryan TE, Ferrara PJ, Hickner RC, Brophy PM, Neuffer PD, McClung JM, and  
661 Funai K. Greater Oxidative Capacity in Primary Myotubes from Endurance-trained  
662 Women. *Med Sci Sports Exerc.* 2017;49(11):2151-7.
- 663 57. Heden TD, Johnson JM, Ferrara PJ, Eshima H, Verkerke ARP, Wentzler EJ, Siripoksup  
664 P, Narowski TM, Coleman CB, Lin CT, et al. Mitochondrial PE potentiates respiratory  
665 enzymes to amplify skeletal muscle aerobic capacity. *Science advances.*  
666 2019;5(9):eaax8352.
- 667 58. Verkerke ARP, Ferrara PJ, Lin C-T, Johnson JM, Ryan TE, Maschek JA, Eshima H,  
668 Paran CW, Laing BT, Siripoksup P, et al. Phospholipid methylation regulates muscle  
669 metabolic rate through Ca<sup>2+</sup> transport efficiency. *Nature Metabolism.* 2019;1(9):876-85.
- 670 59. Johnson JM, Verkerke ARP, Maschek JA, Ferrara PJ, Lin C-T, Kew KA, Neuffer PD,  
671 Lodhi IJ, Cox JE, and Funai K. Alternative splicing of UCP1 by non-cell-autonomous  
672 action of PEMT. *Molecular Metabolism.* 2020;31(55-66).
- 673 60. Zeczycki TN, Whelan J, Hayden WT, Brown DA, and Shaikh SR. Increasing levels of  
674 cardiolipin differentially influence packing of phospholipids found in the mitochondrial  
675 inner membrane. *Biochem Biophys Res Commun.* 2014;450(1):366-71.
- 676 61. Park S, Turner KD, Zheng D, Brault JJ, Zou K, Chaves AB, Nielsen TS, Tanner CJ,  
677 Treebak JT, and Houmard JA. Electrical pulse stimulation induces differential responses  
678 in insulin action in myotubes from severely obese individuals. *J Physiol.*  
679 2019;597(2):449-66.
- 680 62. Al-Khallili L, Chibalin AV, Kannisto K, Zhang BB, Permert J, Holman GD, Ehrenborg E,  
681 Ding VD, Zierath JR, and Krook A. Insulin action in cultured human skeletal muscle cells  
682 during differentiation: assessment of cell surface GLUT4 and GLUT1 content. *Cell Mol*  
683 *Life Sci.* 2003;60(5):991-8.
- 684 63. Funai K, Lodhi IJ, Spears LD, Yin L, Song H, Klein S, and Semenkovich CF. Skeletal  
685 Muscle Phospholipid Metabolism Regulates Insulin Sensitivity and Contractile Function.  
686 *Diabetes.* 2016;65(2):358-70.
- 687 64. Funai K, Song H, Yin L, Lodhi IJ, Wei X, Yoshino J, Coleman T, and Semenkovich CF.  
688 Muscle lipogenesis balances insulin sensitivity and strength through calcium signaling.  
689 *The Journal of clinical investigation.* 2013;123(3):1229-40.
- 690 65. Ferrara PJ, Verkerke ARP, Brault JJ, and Funai K. Hypothermia Decreases O<sub>2</sub> Cost for  
691 Ex Vivo Contraction in Mouse Skeletal Muscle. *Med Sci Sports Exerc.*  
692 2018;50(10):2015-23.
- 693 66. Mendez JaK, A. . Density and Composition of Mammalian Muscle. *Metabolism.*  
694 1960;9(4).

- 695 67. Moorwood C, Liu M, Tian Z, and Barton ER. Isometric and eccentric force generation  
696 assessment of skeletal muscles isolated from murine models of muscular dystrophies. *J*  
697 *Vis Exp.* 2013(71):e50036.
- 698 68. Brooks SV, and Faulkner JA. Contractile properties of skeletal muscles from young,  
699 adult and aged mice. *J Physiol.* 1988;404(71-82).
- 700 69. Rockett BD, Teague H, Harris M, Melton M, Williams J, Wassall SR, and Shaikh SR.  
701 Fish oil increases raft size and membrane order of B cells accompanied by differential  
702 effects on function. *J Lipid Res.* 2012;53(4):674-85.
- 703 70. Otsu N. Threshold Selection Method from Gray-Level Histograms. *Ieee T Syst Man Cyb.*  
704 1979;9(1):62-6.
- 705 71. Sezgin M, and Sankur B. Survey over image thresholding techniques and quantitative  
706 performance evaluation. *J Electron Imaging.* 2004;13(1):146-68.
- 707 72. Shaikh SR, Rockett BD, Salameh M, and Carraway K. Docosahexaenoic acid modifies  
708 the clustering and size of lipid rafts and the lateral organization and surface expression  
709 of MHC class I of EL4 cells. *J Nutr.* 2009;139(9):1632-9.

710

Figure 1

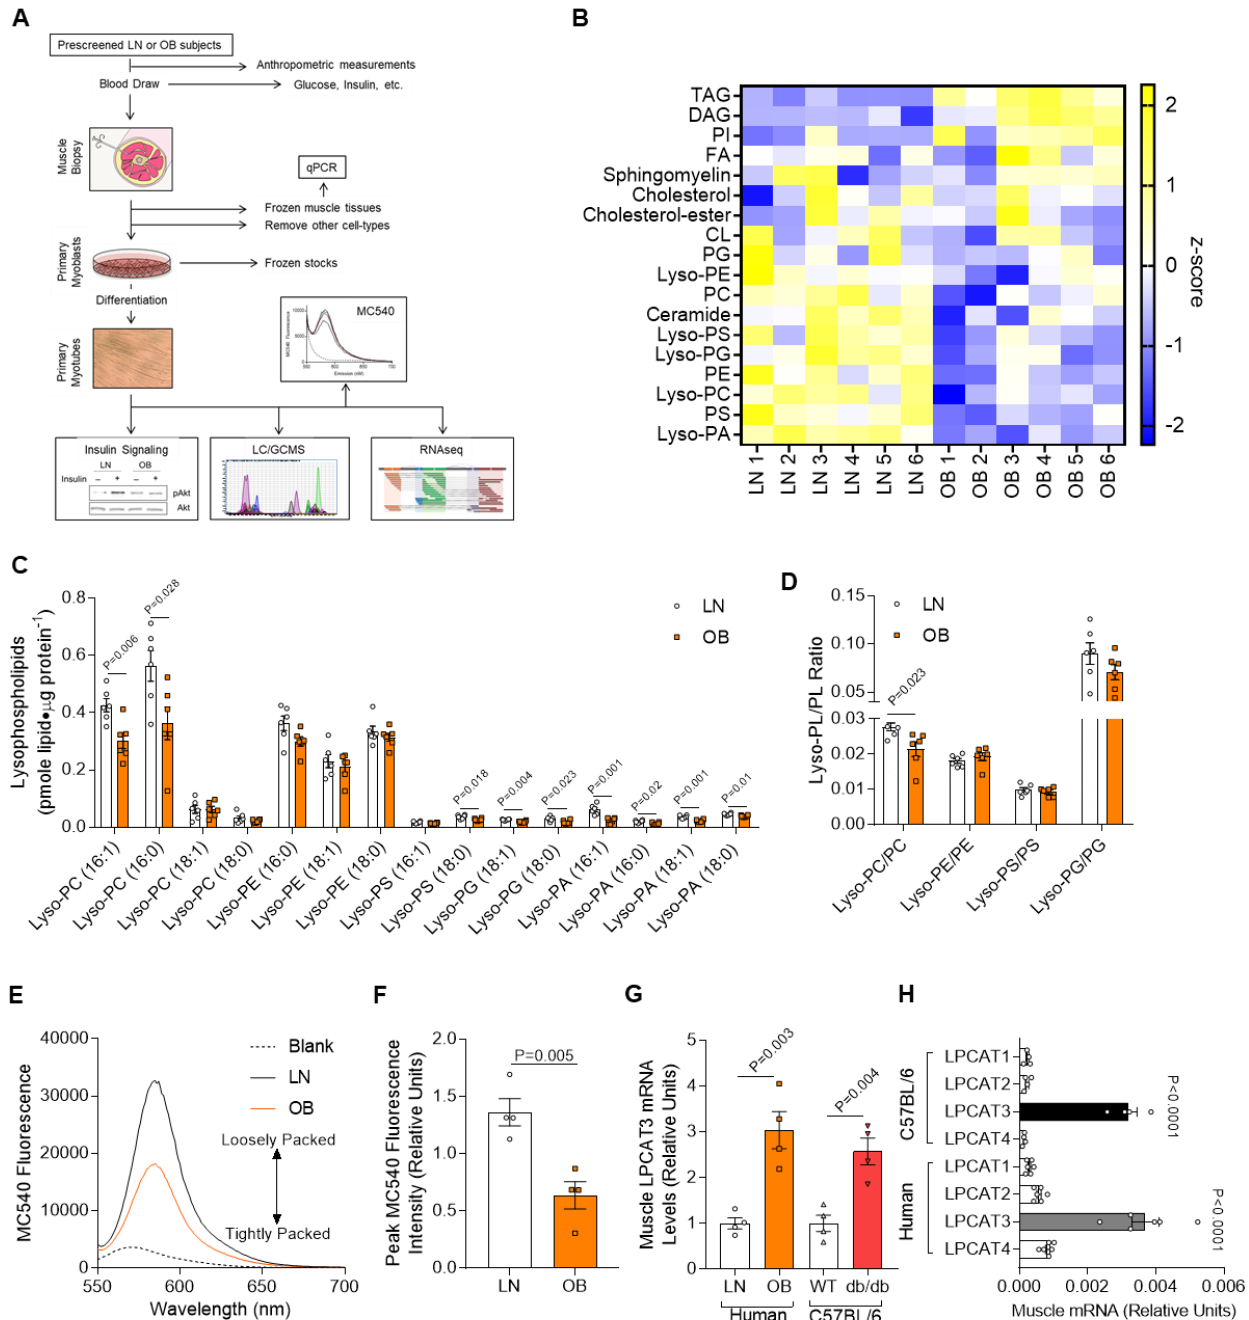

711

712 **Figure 1: Lipidomic analyses of skeletal muscle samples from lean and obese human**

713 **subjects.** (A) A schematic of the workflow for the clinical study. (B-D) Lipidomic analysis of

714 HSkMC from lean insulin-sensitive (LN) and obese insulin-resistant (OB) subjects. (B) Heat map

715 of lipid content by class. (C) Species of lysophospholipids. (D) Lysophospholipid to phospholipid

716 ratio ( $n=6$ ). (E&F) Quantification of MC540 fluorescence in LN and OB HSkMC ( $n=4$ ). (G)  
717 LPCAT3 mRNA in muscle biopsies from LN or OB subjects (left), and in skeletal muscle of wild  
718 type (WT) or a db/db (right) mice ( $n=4$ ). (H) Expression of all isoforms of LPCAT in muscle  
719 samples from mouse ( $n=4$ ) or human ( $n=6$ ) skeletal muscle. (C,D,F&G) Two-tailed t-tests. (H)  
720 One-way ANOVA followed by post-hoc multiple comparisons. All data are represented as mean  
721  $\pm$  SEM.  
722

Figure 2

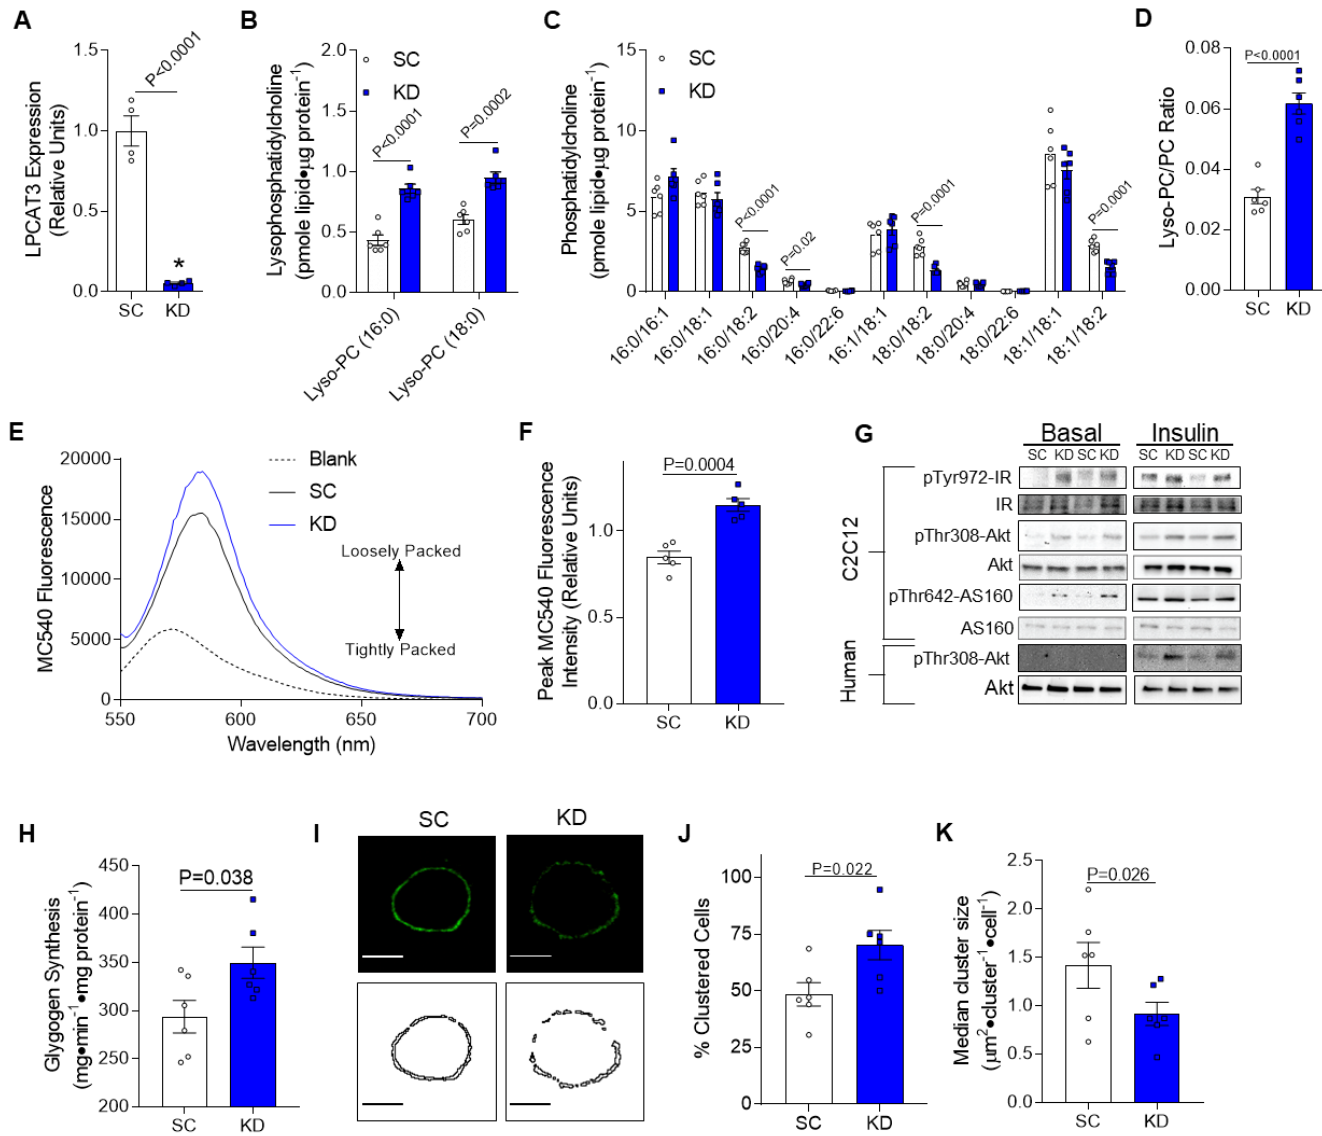

723

724 **Figure 2: LPCAT3 knockdown enhances skeletal muscle insulin sensitivity *in vitro*.** (A)

725 LPCAT3 mRNA levels in myoblasts infected with lentiviruses expressing shRNA for scrambled

726 (SC) or LPCAT3 sequences (KD) and differentiated into myotubes ( $n=4$ ). (B-D) Lipids were

727 extracted from C2C12 myotubes for analysis between SC and KD cells. Quantification of (B)

728 lysophosphatidylcholine (lyso-PC), (C) phosphatidylcholine (PC), and (D) total lyso-PC/PC

729 ( $n=6$ ). (E&F) Quantification of MC540 fluorescence in SC and KD myotubes ( $n=5$ ). (G)

730 Phosphorylation and total protein of IR, Akt, and AS160 were measured via Western blot with  
731 (0.6 nM) or without insulin in C2C12 myotubes (top) and human primary skeletal muscle cells  
732 (bottom). (H) Glycogen synthesis was quantified in C2C12 cells incubated with insulin (12 nM)  
733 ( $n=6$ ). (I-K) GM-1 enriched microdomains were labeled in SC and KD round-up myotubes. (I)  
734 Plasma membrane GM-1 localization was visualized (top panels: fluorescence images, bottom  
735 panels: binary images). (J) Cells were scored as clustered or non-clustered between SC and KD  
736 myotubes. (K) Particle size was measured for each cell in 6 separate experiments and the  
737 median for each experiment was used as a representative of that experiment ( $n=35$ -  
738  $50$ /experiment, 6 separate experiments). (A-D,F,H,J&K) Two-tailed t-tests were performed. All  
739 data are represented as mean  $\pm$  SEM.

Figure 3

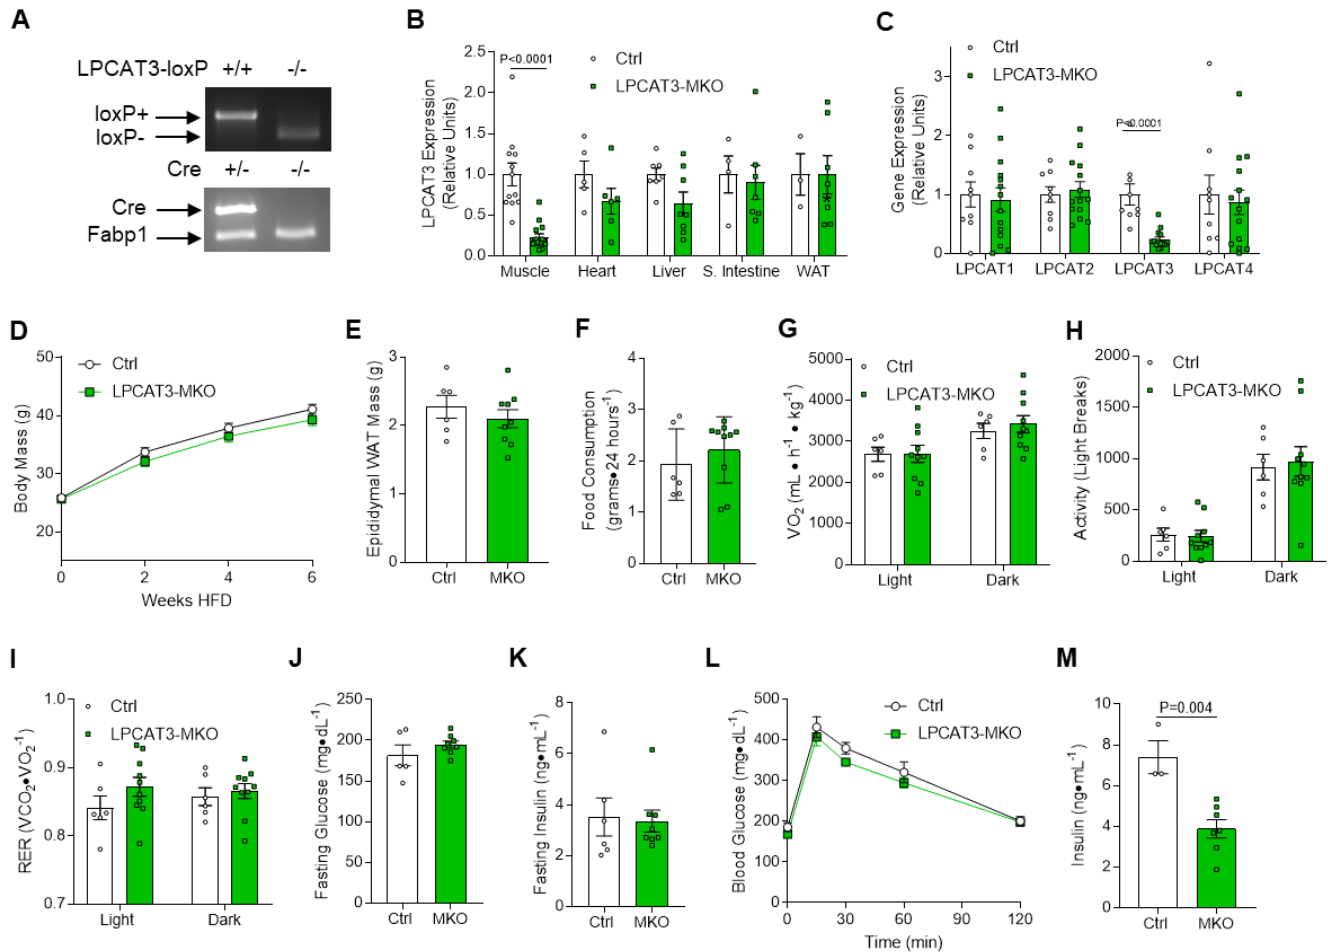

740

741 **Figure 3: Whole-body phenotyping of LPCAT3-MKO mice.** (A) Mice with tamoxifen-inducible

742 skeletal muscle-specific Cre-recombinase (HSA-MerCreMer+/-) were crossed with mice with

743 *LoxP* sites flanking exon3 of the *Lpcat3* gene (LPCAT3cKO+/+) to generate skeletal-muscle-

744 specific inducible knock out of LPCAT3 (LPCAT3cKO+/+, HSA-MerCreMer+/-) (LPCAT3-MKO).

745 Littermates (LPCAT3cKO+/+, HSA-MerCreMer-/-) (Ctrl) were used as control mice for all

746 experiments. (B) LPCAT3 mRNA in tibialis anterior (TA, Muscle), heart, liver, small intestine (S.

747 Intestine), and inguinal white adipose tissue (WAT) (muscle: Ctrl *n*=12, MKO *n*=15; heart: Ctrl

748 *n*=5, MKO *n*=6; liver: Ctrl *n*=7, MKO *n*=8; S. Intestine: Ctrl *n*=4, MKO *n*=7; WAT: Ctrl *n*=3, MKO

749 *n*=7). (C) mRNA of all LPCAT isoforms in TA muscles of Ctrl and LPCAT3-MKO mice (Ctrl *n*=9,

750 MKO  $n=14$ ) (D) Body mass during high-fat diet (HFD) feeding in Ctrl and LPCAT3-MKO mice  
751 (Ctrl  $n=8$ , MKO  $n=11$ ). (E) Epididymal WAT mass (Ctrl  $n=6$ , MKO  $n=9$ ). (F-I) Ctrl and LPCAT3-  
752 MKO mice were placed in metabolic chambers for measurement of (F) food consumption, (G)  
753  $VO_2$ , (H) activity, and (I) respiratory exchange ratio (RER) (Ctrl  $n=6$ , MKO  $n=10$ ). (J) Fasting  
754 glucose (Ctrl  $n=5$ , MKO  $n=9$ ). (K) Fasting insulin (Ctrl  $n=6$ , MKO  $n=9$ ). (L) Intraperitoneal  
755 glucose tolerance test (Ctrl  $n=6$ , MKO  $n=8$ ). (M) Serum insulin at the 30-minute time point of the  
756 glucose tolerance test (Ctrl  $n=3$ , MKO  $n=8$ ). All data except (A) are from HFD-fed mice. (B,C,E-  
757 K&M) Two-tailed t-tests or (D&L) 2-way ANOVA with Sidak's multiple comparisons test were  
758 performed. All data are represented as mean  $\pm$  SEM.

759



Figure 4

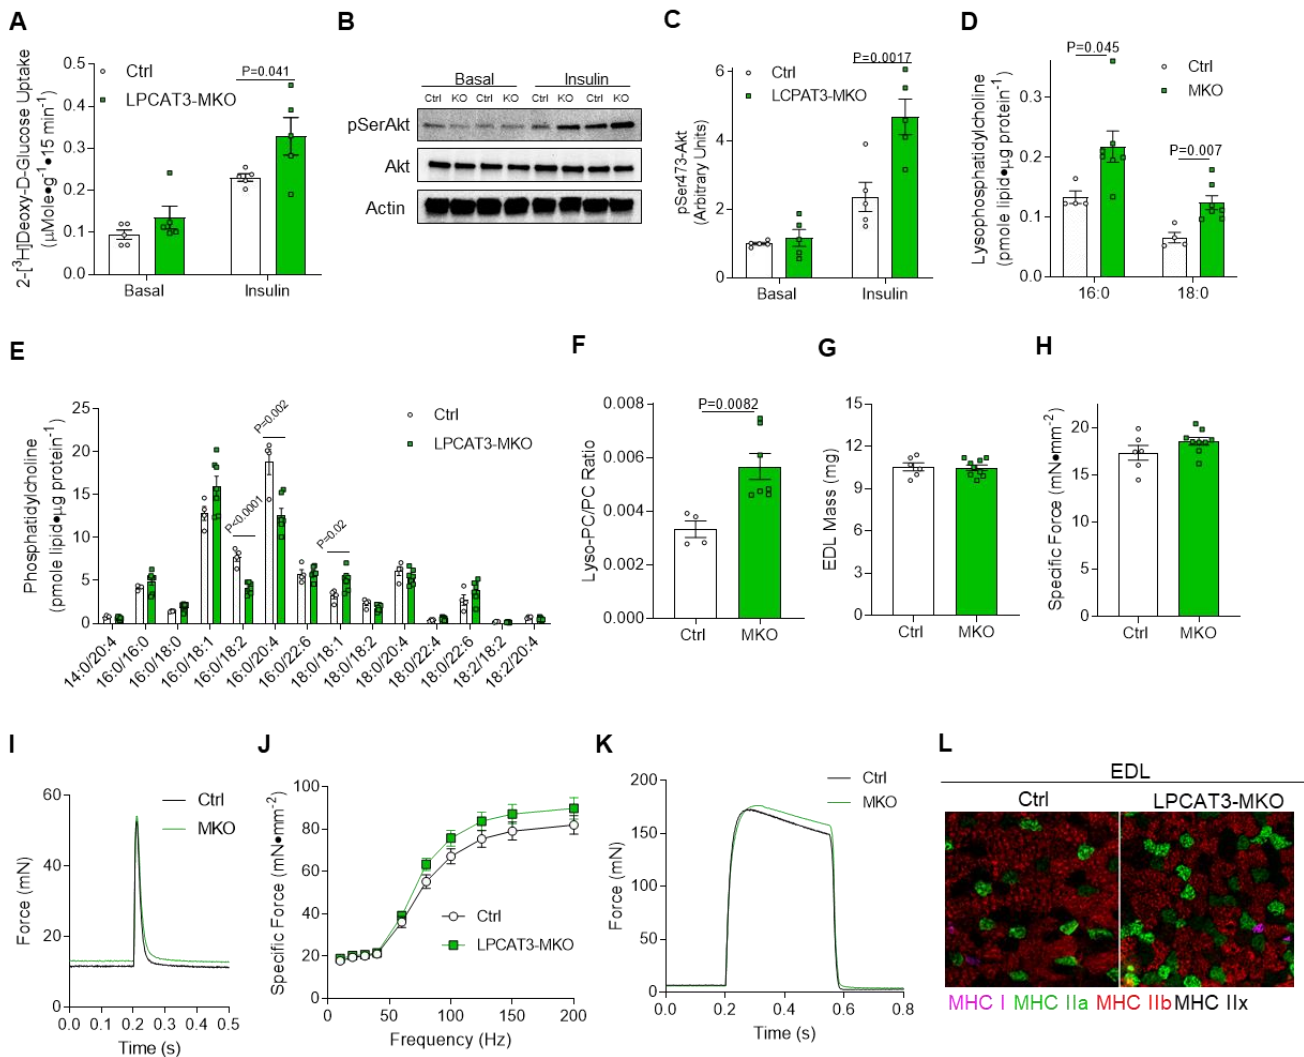

760

761 **Figure 4: LPCAT3-MKO mice are protected from diet-induced skeletal muscle insulin**

762 **resistance.** (A-C) Soleus muscles were dissected and incubated with or without 200  $\mu\text{U}/\text{mL}$  of

763 insulin. (A) *Ex vivo* 2-deoxyglucose uptake ( $n=5$ ). (B&C) Ser473 phosphorylation and total Akt

764 (Ctrl  $n=5$ , MKO  $n=6$ ). (D-F) Lipids were extracted from gastrocnemius muscles of Ctrl and

765 LPCAT3-MKO mice for mass spectrometric analysis. Quantification of (D) lyso-PC, (E) PC, and

766 (F) total lyso-PC/PC (Ctrl  $n=4$ , MKO  $n=7$ ). (G-L) Extensor digitorum longus (EDL) muscles of

767 Ctrl and LPCAT3-MKO mice were dissected for measurement of (G) mass, (H&I) force

768 produced with a pulse stimulation, (J&K) force produced with tetanic stimulation ranging from

769 10-200 Hz (K, force tracing at 200 Hz stimulation) (Ctrl  $n=6$ , MKO  $n=9$ ), and (L) skeletal muscle  
770 fiber-type (MHC I: pink, MHC IIa: green, MHC IIb:red, and MHC IIx: negative). All data are from  
771 HFD-fed mice. (A,C&J) 2-way ANOVA with Sidak's multiple comparisons test or (D-H) two-tailed  
772 t-tests were performed. All data are represented as mean  $\pm$  SEM.

Figure 5

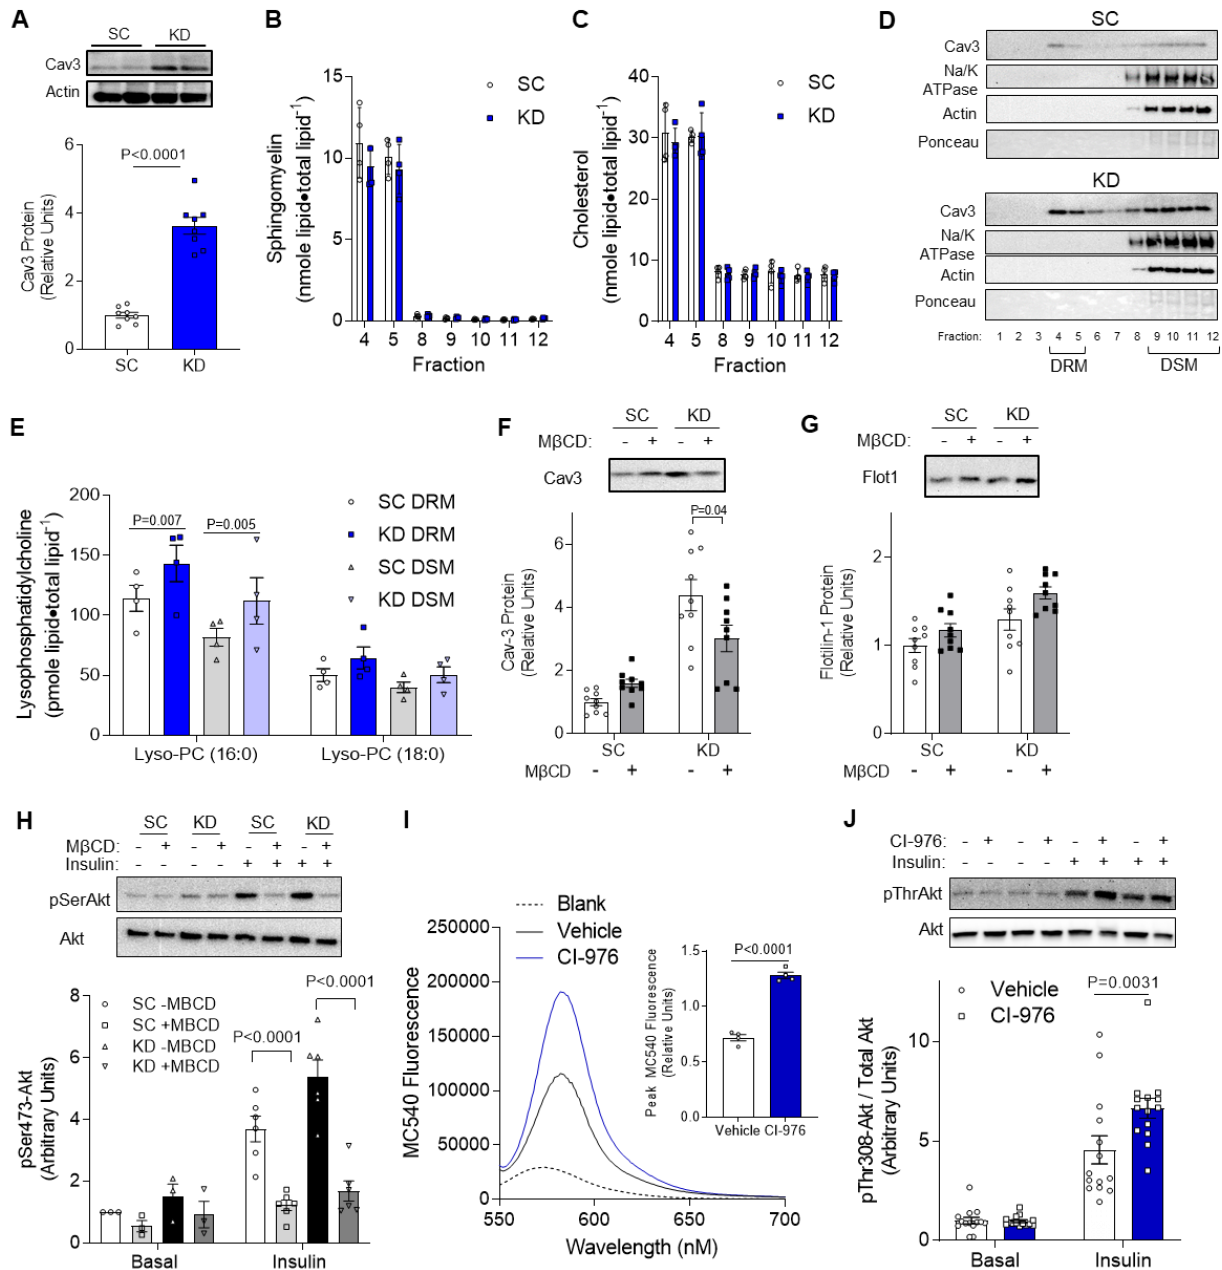

773

774 **Figure 5: LPCAT3 deletion alters plasma membrane organization.** C2C12 cells were  
 775 infected with lentiviruses expressing shRNA for scrambled (SC) or LPCAT3 (KD) and  
 776 differentiated into myotubes. (A) Caveolin-3 (cav3) protein content. (B&C) Detergent-resistant  
 777 membranes (DRM; fractions 4&5) and detergent-soluble membranes (DSM; fractions 8-12)

778 were isolated and lipids were extracted for quantification of (B) sphingomyelin and (C)  
779 cholesterol ( $n=4$ ). (D) Cav3, Na/K ATPase, actin, and total protein content were assessed via  
780 Western blot in all fractions from the sucrose gradient. (E) Lyso-PC levels in DSM and DRM  
781 isolations ( $n=4$ ). (F-H) C2C12 myotubes were incubated in the presence (10 mM) or absence of  
782 methyl-beta-cyclodextrin (M $\beta$ CD) for 1 hour. (F&G) M $\beta$ CD successfully depletes cav3 ( $P<0.001$ ,  
783 main effect of LPCAT3 knockdown) but not flotillin1 ( $P=0.003$  main effect of LPCAT3  
784 knockdown,  $P=0.01$  main effect of M $\beta$ CD) ( $n=9$ ). (H) Cells were incubated in the presence (0.6  
785 nM) or absence of insulin and were blotted for total or Ser473 phosphorylation of Akt ( $n=3$   
786 Basal,  $n=6$  Insulin). (I&J) C2C12 myoblasts were differentiated into myotubes with either CI-976  
787 or vehicle. (I) Quantification of MC540 fluorescence ( $n=6$ ). (J) Western blot of Thr308  
788 phosphorylation and total Akt in the presence (12 nM) and absence of insulin ( $n=14$ ,  $P=0.024$   
789 main effect of insulin) (A-C&I) Two-tailed t-tests or (E-H&J) 2-way ANOVA with Sidak's multiple  
790 comparisons test were performed. All data are represented as mean  $\pm$  SEM.  
791

Figure 6

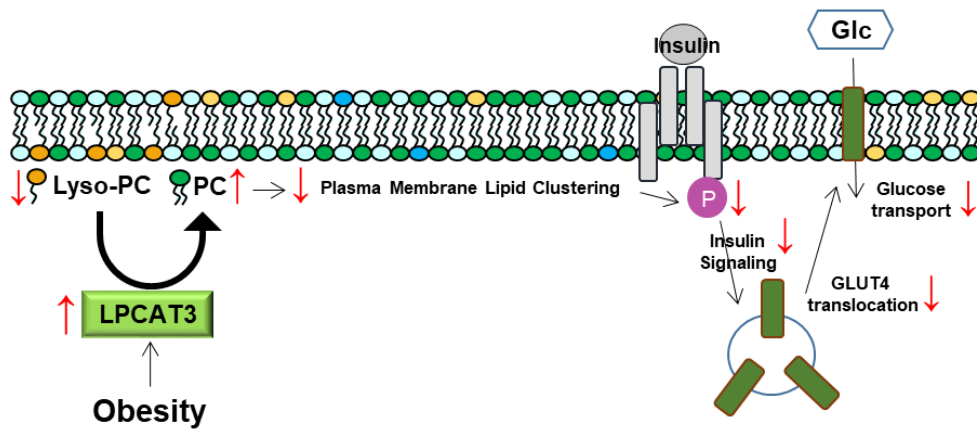

792

793 **Figure 6: A proposed mechanism of action by which LPCAT3 promotes diet-induced**  
794 **skeletal muscle insulin resistance.**

795

Figure S1

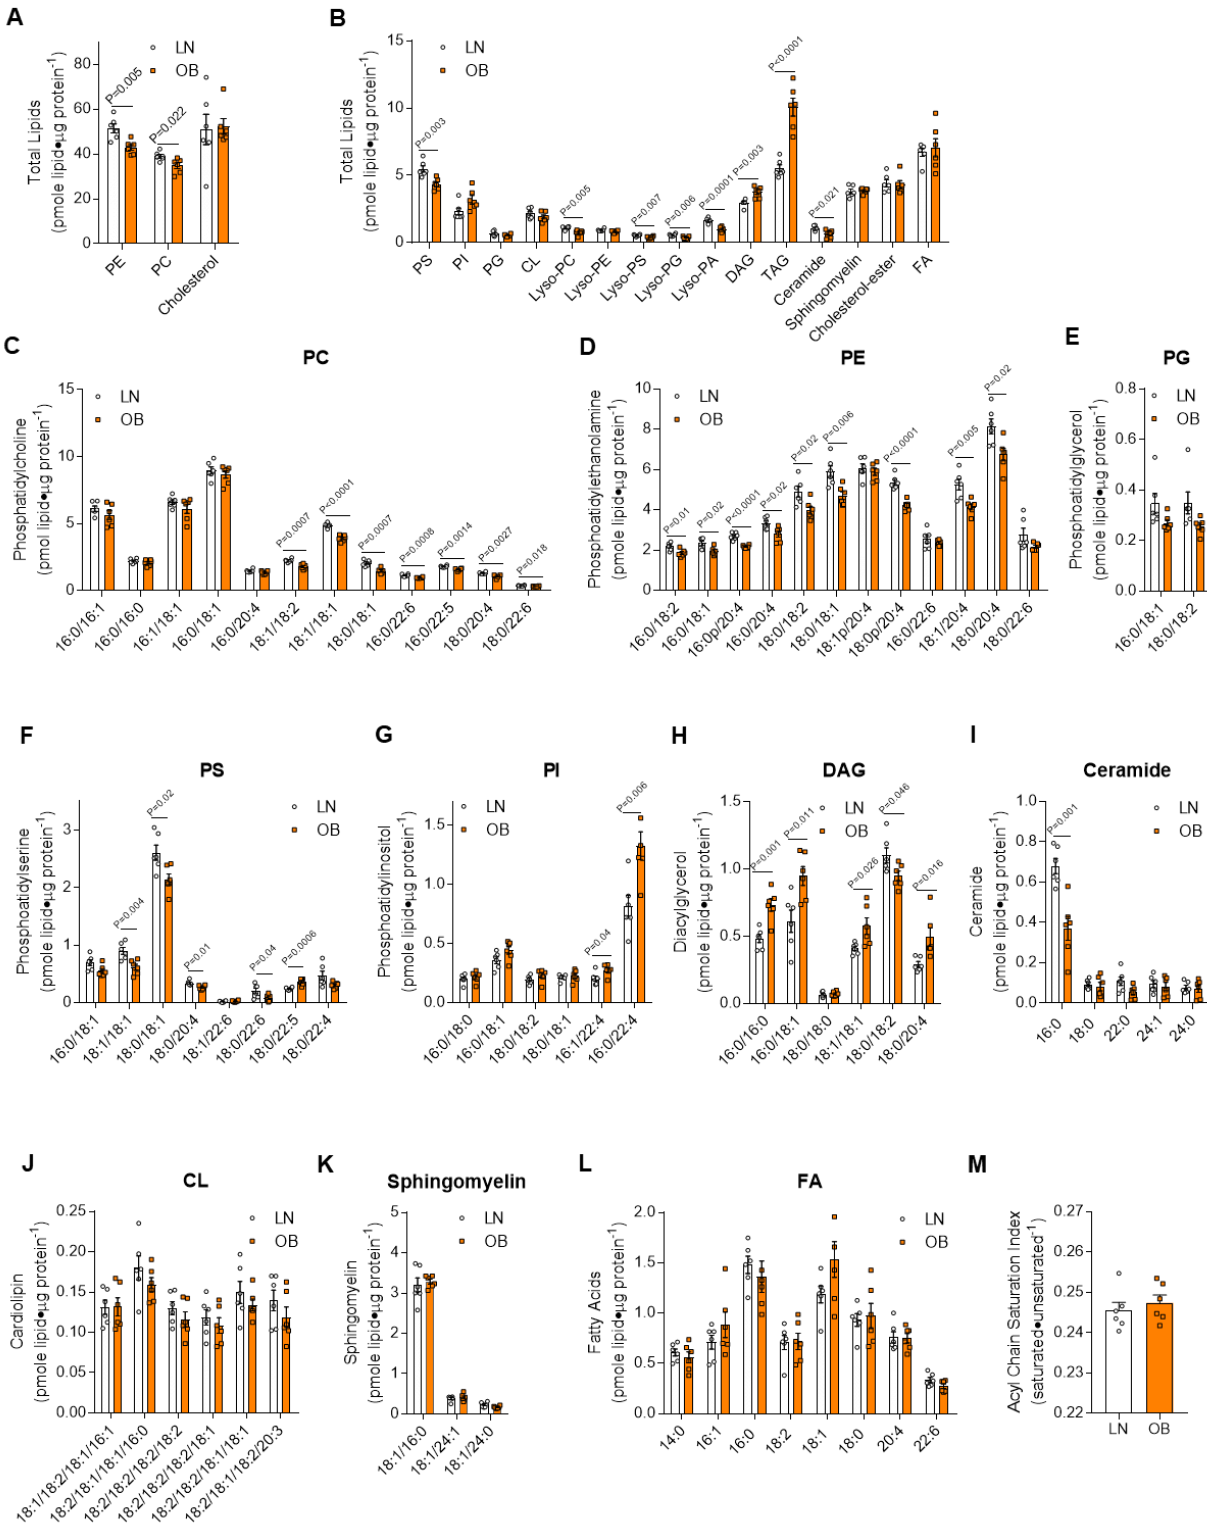

796

797 **Figure S1: Lipid quantification in LN and OB HSkMC.** (A-M) Muscle biopsies were taken  
798 from LN or OB human subjects and primary skeletal muscle cells were isolated and  
799 differentiated. Quantification of (A&B) total lipids by class, and species of (C)  
800 phosphatidylcholine (PC), (D) phosphatidylethanolamine (PE), (E) phosphatidylglycerol (PG),  
801 (F) phosphatidylserine (PS), (G) phosphatidylinositol (PI), (H) diacylglycerol (DAG), (I)  
802 ceramide, (J) cardiolipin (CL), (K) sphingomyelin, and (L) fatty acid (FA). (M) Quantification of  
803 the acyl chain saturation index of all detectable phospholipids. ( $n=6$ ). Two-tailed t-tests were  
804 performed for all analyses. All data are represented as mean  $\pm$  SEM.  
805

Figure S2

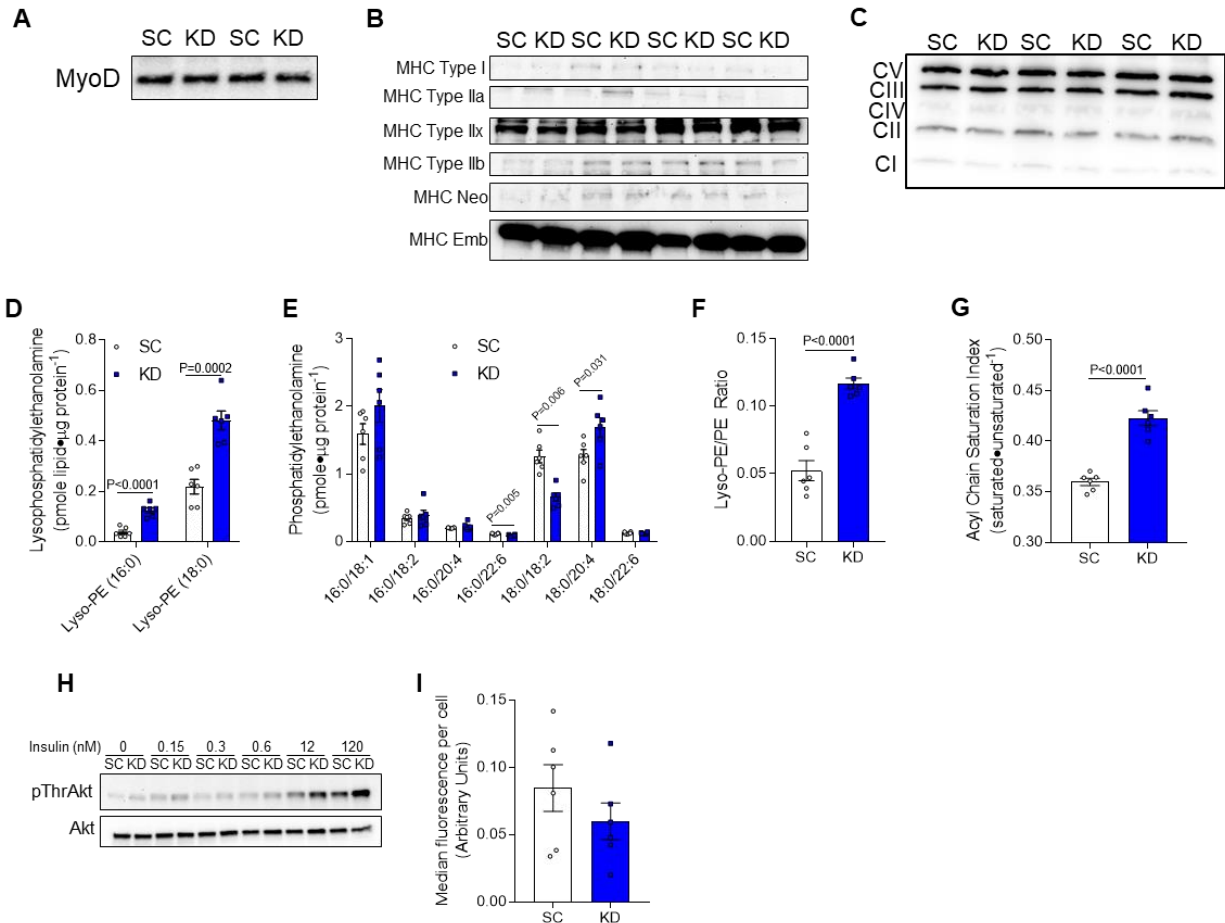

806

807 **Figure S2: Knockdown of LPCAT3 in C2C12 myotubes.** C2C12 myoblasts were infected with  
 808 shRNA generating lentiviruses targeting scrambled (shScrambled; SC) or LPCAT3 (shLPCAT3;  
 809 KD) to decrease LPCAT3 expression and cells were differentiated into myotubes. (A-C)  
 810 Western blot in SC and KD cells probing for (A) MyoD, (B) myosin heavy chain isoforms, and  
 811 (C) complexes I-V of the electron transport chain. (D-G) Lipids were extracted in SC and KD  
 812 myotubes for quantification of (D) lyso-PE, (E) PE species, (F) total lyso-PE/PE, and (G) acyl  
 813 chain saturation index of phospholipids ( $n=6$ ). (H) Thr308 phosphorylation and total Akt from  
 814 cells incubated (10 min) with various concentrations of insulin. (I) GM-1 microdomains were  
 815 labeled with GFP and cross-linked to induce patching in SC and KD C2C12 myotubes. Total  
 816 fluorescence in each cell was measured across 6 separate experiments ( $n=35-50$ /experiment)



817 and the median of each experiment was used as a representative. Two-tailed t-tests were  
818 performed. All data are represented as mean  $\pm$  SEM.

Figure S3

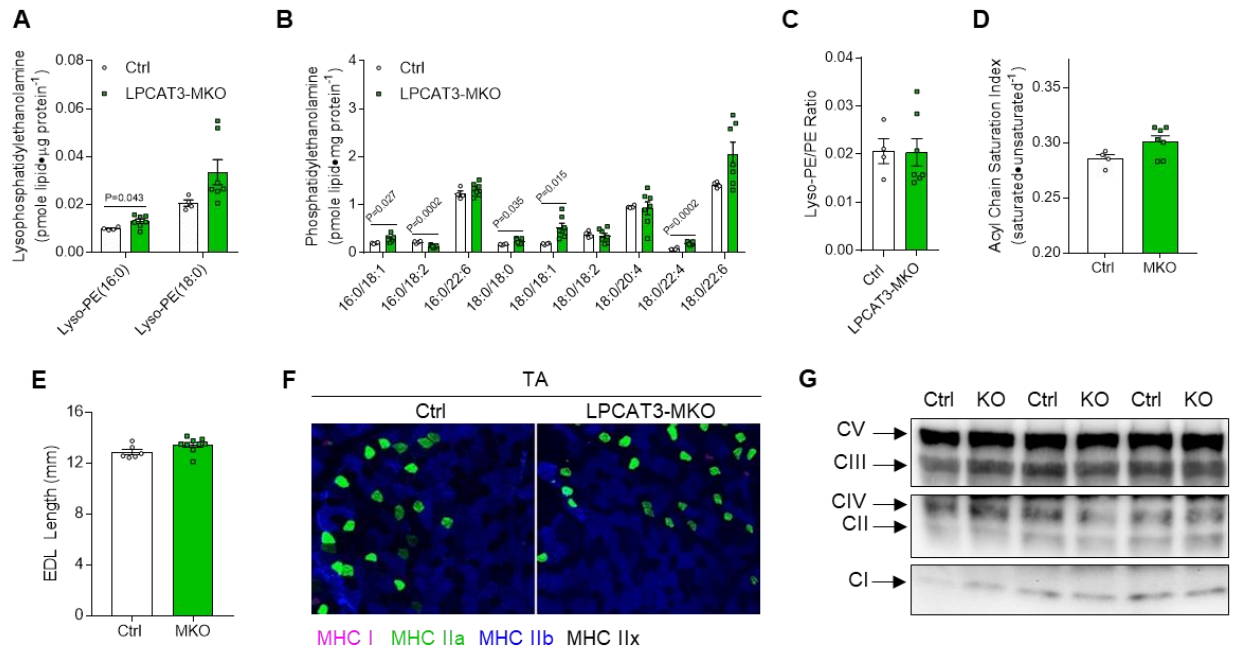

819

820 **Figure S3: Additional data on muscles from HFD-fed Ctrl and LPCAT3-MKO mice. (A-D)**

821 Lipids were extracted from gastrocnemius muscles of Ctrl and LPCAT3-MKO mice for analysis.

822 Quantification of (A) lyso-PE species, (B) PE species, (C) total lyso-PE/PE, and (D)

823 phospholipid acyl chain saturation index (Ctrl  $n=4$ , MKO  $n=7$ ). (E) Muscle lengths of extensor

824 digitorum longus (EDL) muscles (Ctrl  $n=6$ , MKO  $n=9$ ). (F) Skeletal muscle fiber-type (MHC I:

825 pink, MHC IIa: green, MHC IIb:blue, and MHC IIx: negative) of tibialis anterior (TA) muscles. (G)

826 Measurement of complexes I-V of the electron transport chain in TA muscles from Ctrl and

827 LPCAT3-MKO mice. (A-E) Two-tailed t-tests. All data are represented as mean  $\pm$  SEM.

Figure S4

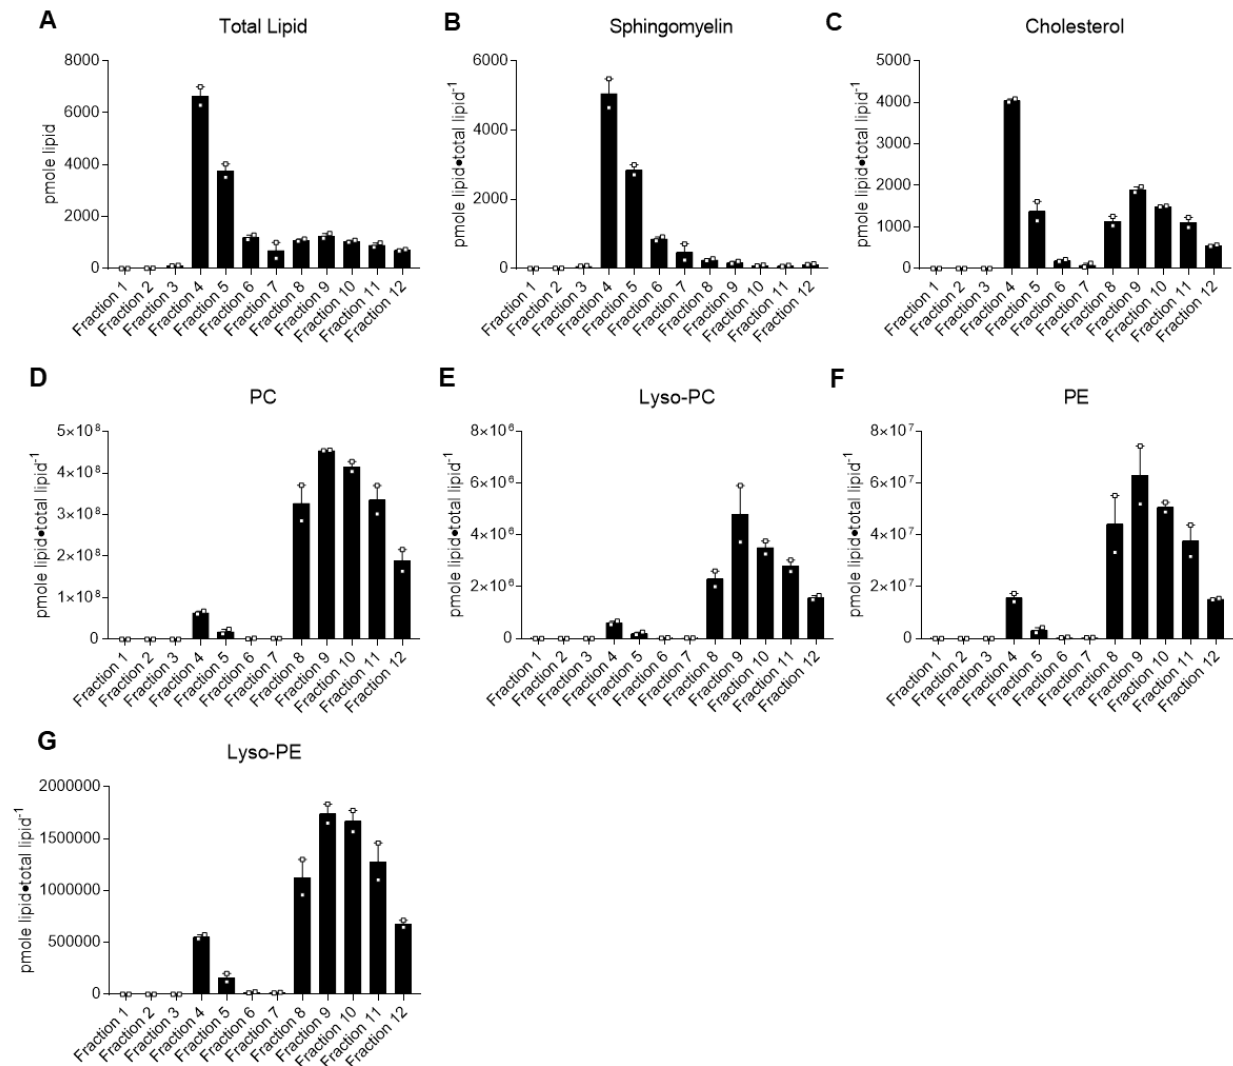

828

829 **Figure S4: Lipid contents of detergent-resistant and detergent-soluble membrane**

830 **fractions.** (A-G) Wild type C2C12 myotubes were suspended in a sucrose gradient and purified  
831 via ultracentrifugation to separate detergent-resistant membrane (DRM) fractions from detergent  
832 soluble membrane (DSM) fractions. After ultracentrifugation fractions were analyzed for (A) total  
833 lipid content, (B) sphingomyelin, (C) cholesterol, (D) PC, (E) lyso-PC, (F) PE, and (G) lyso-PE  
834 ( $n=2$ ). All data are represented as mean  $\pm$  SEM.

Figure S5

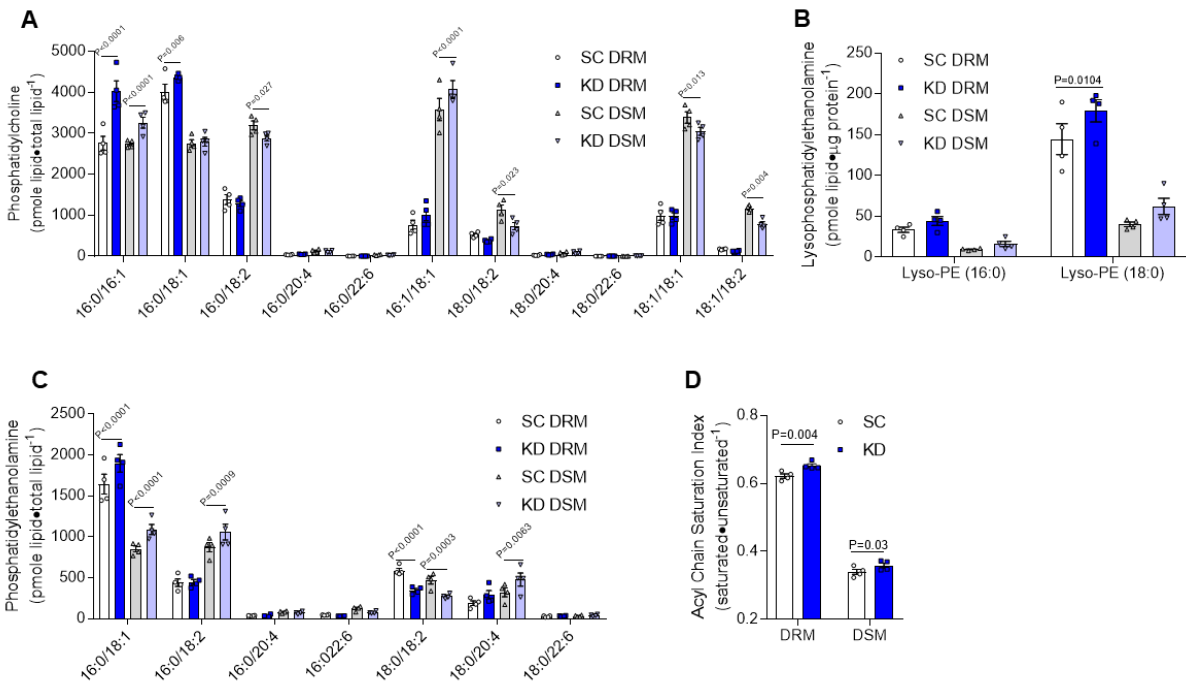

835

836 **Figure S5: Plasma membrane microdomains and phospholipid composition in membrane**

837 **fractions with LPCAT3 inhibition. (A-D) SC and KD C2C12 myotubes were suspended in a**

838 **sucrose density gradient and purified with ultracentrifugation. (A) PC, (B) Lyso-PE, (C) PE**

839 **species, and (D) acyl chain saturation index of all phospholipids were quantified in DRM and**

840 **DSM fractions ( $n=4$ ). (D) Two-tailed t-tests or (A-C) 2-way ANOVA with Sidak's multiple**

841 **comparisons test were performed. All data are represented as mean  $\pm$  SEM.**

842 **Table S1:** Subject characteristics of lean insulin-sensitive (LN) and obese insulin-resistant (OB)  
843 subjects ( $n=6/\text{group}$ ).

|                                                  | LN         | OB         | p       |
|--------------------------------------------------|------------|------------|---------|
| Age (year)                                       | 30.2±3.5   | 35.8±3.1   | 0.25    |
| Height (cm)                                      | 162.4±2.8  | 166.9±2.6  | 0.26    |
| Weight (kg)                                      | 62.9±2.4   | 126.1±8.0  | <0.0001 |
| BMI ( $\text{kg}\cdot\text{m}^{-2}$ )            | 23.85±0.67 | 45.0±1.85  | <0.0001 |
| Glucose ( $\text{mg}\cdot\text{dL}^{-1}$ )       | 81.3±1.0   | 92.3±4.3   | 0.031   |
| Insulin ( $\mu\text{U}\cdot\text{mL}^{-1}$ )     | 6.4±1.3    | 15.9±1.3   | 0.0004  |
| HOMA-IR                                          | 1.29±0.27  | 3.6±0.44   | 0.001   |
| Cholesterol ( $\text{mg}\cdot\text{dL}^{-1}$ )   | 177.7±13.0 | 177±12.9   | 0.97    |
| HDL ( $\text{mg}\cdot\text{dL}^{-1}$ )           | 55.2±2.3   | 47.0±2.9   | 0.050   |
| LDL ( $\text{mg}\cdot\text{dL}^{-1}$ )           | 105.2±11.9 | 109.5±8.6  | 0.78    |
| Triglycerides ( $\text{mg}\cdot\text{dL}^{-1}$ ) | 86.8±19.8  | 102.7±23.7 | 0.62    |

844

845

846 **Table S2:** Primers used for quantitative-RT-PCR.

| Gene      | Species | F/R | Sequence (5'→3')       |
|-----------|---------|-----|------------------------|
| L32       | Mouse   | F   | TTCCTGGTCCACAATGTCAA   |
|           |         | R   | GGCTTTTCGGTTCTTAGAGGA  |
| LPCAT1    | Mouse   | F   | CACGAGCTGCGACTGAGC     |
|           |         | R   | ATGAAAGCAGCGAACAGGAG   |
| LPCAT2    | Mouse   | F   | ACCTGTTTCCGATGTCCTGA   |
|           |         | R   | CCAGGCCGATCACATACTCT   |
| LPCAT3    | Mouse   | F   | GGCCTCTCAATTGCTTATTTCA |
|           |         | R   | AGCACGACACATAGCAAGGA   |
| LPCAT4    | Mouse   | F   | GAGTTACACCTCTCCGGCCT   |
|           |         | R   | GGCCAGAGGAGAAAGAGGAC   |
| L32       | Human   | F   | GTCAAGGAGCTGGAAGTGCT   |
|           |         | R   | CTCTTTCCACGATGGCTTTG   |
| LPCAT1    | Human   | F   | CAGGCCAGCAGCATCAT      |
|           |         | R   | TCAGCGCCCTGCAGAAG      |
| LPCAT2    | Human   | F   | TTGCCTGTTTCAGATGTCTTG  |
|           |         | R   | GCCAGGCCAATCACATACTC   |
| LPCAT3    | Human   | F   | AGCCTTAACAAGTTGGCGAC   |
|           |         | R   | TGCCGATAAAACAAAGCAA    |
| LPCAT4    | Human   | F   | CCCTTCGTGCATGAGTTACA   |
|           |         | R   | ATAAAGGCCAGAAGCACTCG   |
| Caveolin3 | Mouse   | F   | GGATCTGGAAGCTCGGATCAT  |
|           |         | R   | TCCGCAATCACGTCTTCAAAT  |

847
